1 **SHORT TITLE: GmYSL7, a peptide transporter essential for SNF.**

2

3 **Corresponding author details:** Penelope Smith, School of Life Sciences, Agribio, 5  
4 Ring Rd, Bundoora, Victoria, 3083, Australia.

5

6 **TITLE: Soybean Yellow Stripe-like7 is a symbiosome membrane peptide**  
7 **transporter essential for nitrogen fixation**

8

9 Gavrin A<sup>2</sup>, Loughlin PC<sup>2</sup>, Brear EM<sup>2</sup>, Griffith OW<sup>6,7</sup>, Bedon F<sup>1</sup>, Suter Grotemeyer  
10 M<sup>4</sup>, Escudero V<sup>5</sup>, Reguera M<sup>5</sup>, Qu Y<sup>2</sup>, Mohd-Noor SN<sup>2</sup>, Chen C<sup>2</sup>, Osorio MB<sup>1</sup>,  
11 Rentsch D<sup>4</sup>, González-Guerrero M<sup>5</sup>, Day DA<sup>3</sup>, Smith PMC<sup>1\*</sup>.

12 <sup>1</sup>School of Life Sciences. La Trobe University, Bundoora, Victoria 3083. Australia.

13 <sup>2</sup>School of Life and Environmental Science, The University of Sydney, Sydney, New  
14 South Wales, 2006, Australia

15 <sup>3</sup>College of Science and Engineering, Flinders University, Bedford Park, Adelaide,  
16 SA, Australia

17 <sup>4</sup>IPS, Molecular Plant Physiology, University of Bern, Altenbergrain 21, 3013 Bern  
18 Switzerland

19 <sup>5</sup>Centro de Biotecnología y Genómica de Plantas (UPM-INIA). Universidad  
20 Politécnica de Madrid. Campus de Montegancedo. Crta. M-40 km 38. 28223 Pozuelo  
21 de Alarcón (Madrid), Spain

22 <sup>6</sup>School of BioSciences, University of Melbourne, Parkville, VIC, Australia

23 <sup>7</sup>Department of Biological Sciences, Macquarie University, Macquarie Park, NSW,  
24 2109

25

26

27 **One sentence summary:** GmYSL7 is a symbiosome membrane peptide transporter  
28 that is essential for symbiotic nitrogen fixation that when silenced blocks symbiosome  
29 development.

30

31 **Author contributions:** AG completed the gene silencing, RNAseq analysis and  
32 contributed to the localisation. PCL cloned the gene and contributed to the  
33 localisation, promoter GUS analysis and real time analysis. EMB, SNMN, MSG, DR

34 and PMCS completed the analysis of YSL7 in yeast. OG, EMB, MBO, FB and  
35 PMCS analysed the RNAseq results. VE, MR and MGG completed the  
36 complementation of MtYSL7. YQ completed the real time analysis. CC completed  
37 the promoter GUS analysis. PMCS, FB, EMB and DAD isolated symbiosome and  
38 microsomal membrane and did proteomic analysis. PMCS and DAD conceived the  
39 project and were involved in experimental design and analysis. PMCS and AG wrote  
40 the manuscript. All authors contributed to editing of the manuscript.

41

42 **Funding information** : This research was funded by the Australian Research Council  
43 Discovery Projects DP0772452, DP120102780 and DP150102264 and Industrial  
44 Transformation Research HUB IH140100013.

45

#### 46 **ABSTRACT**

47 Legumes form a symbiosis with rhizobia that convert atmospheric nitrogen (N<sub>2</sub>) to  
48 ammonia which they provide to the plant in return for a carbon and nutrient supply.  
49 Nodules, developed as part of the symbiosis, harbor rhizobia which are enclosed in  
50 the plant-derived symbiosome membrane (SM), to form a symbiosome. In the mature  
51 nodule all exchanges between the symbionts occur across the SM. Here we  
52 characterize GmYSL7, a member of Yellow stripe-like family which is localized to  
53 the SM in soybean nodules. It is expressed specifically in nodule infected cells with  
54 expression peaking soon after nitrogenase becomes active. Although most members  
55 of the family transport metal complexed with phyto siderophores, GmYSL7 does not.  
56 It transports oligopeptides of between four and 12 amino acids. Silencing of  
57 GmYSL7 reduces nitrogenase activity and blocks development when symbiosomes  
58 contain a single bacteroid. RNAseq of nodules in which GmYSL7 is silenced suggests  
59 that the plant initiates a defense response against the rhizobia. There is some evidence  
60 that metal transport in the nodules is dysregulated, with upregulation of genes  
61 encoding ferritin and vacuolar iron transporter family and downregulation of a gene  
62 encoding nicotianamine synthase. However, it is not clear whether the changes are a  
63 result of the reduction of nitrogen fixation and the requirement to store excess iron or  
64 an indication of a role of GmYSL7 in regulation of metal transport in the nodules.  
65 Further work to identify the physiological substrate for GmYSL7 will allow  
66 clarification of this role.

67

## 68 INTRODUCTION

69 Legumes form a symbiosis with soil bacteria, rhizobia, that allows them to access N<sub>2</sub>  
70 from the atmosphere. This symbiosis is an important contributor to the biological  
71 nitrogen cycle. The rhizobia fix N<sub>2</sub> via the enzyme nitrogenase to produce ammonia  
72 and provide it to the plant in return for reduced carbon generated via photosynthesis.  
73 This biological N<sub>2</sub>-fixation provides a large proportion of the nitrogen in the natural  
74 environment (Fowler et al., 2013) and is an important component of sustainable  
75 agricultural systems, reducing the requirement for expensive nitrogen fertilizers and  
76 the pollution that can arise from their overuse (Vance, 2001).

77

78 The establishment of this symbiosis involves signaling between the two partners and  
79 results in rhizobia moving through an infection thread derived from an invaginated  
80 root cell wall into the root cortex where a new organ, the nodule is initiated. The cell  
81 wall of the root cells is degraded and the rhizobia released into the cell. Within the  
82 nodule infected cells, the rhizobia are enclosed in a plant-derived membrane to form  
83 an organelle-like compartment called the symbiosome. Within this symbiosome the  
84 rhizobia differentiate into their symbiotic form, the bacteroid. The symbiosome  
85 membrane (SM), initially derived from the plasma membrane (PM), becomes  
86 specialized as an interface between the bacteroid and its plant host, segregating the  
87 bacteroids from the plant cytoplasm and “protecting” them from any plant defense  
88 response (Mohd-Noor et al., 2015).

89

90 The major metabolite exchange across the SM is fixed nitrogen (principally ammonia)  
91 to the plant and a carbon source, most likely malate, to the bacteroids. However,  
92 transport of many other compounds into the symbiosome across the SM must occur as  
93 the enclosed bacteroids depend on the plant for all of their nutrients, including iron,  
94 zinc, calcium and cobalt amongst others (Brear et al. 2013; Udvardi and Poole, 2013;  
95 Clarke et al., 2014). The SM effectively controls the symbiosis via a suite of transport  
96 proteins synthesized by the plant. The plant can control what moves into the  
97 symbiosome and, presumably, can withhold sustenance if required. It has been  
98 suggested that the plant can impose sanctions on non-fixing rhizobia (Kiers et al.,  
99 2003) and controlling transport across the symbiosome membrane could regulate this.  
100 It is also probable that compounds other than ammonia/ammonium move from the  
101 bacteroids to the plant (Udvardi and Poole 2013).

102

103 Transport studies with isolated symbiosomes have demonstrated the presence of a  
104 malate transporter and an ammonium channel on the SM, as well as metal ion  
105 transporters, but their molecular identity remains elusive (Udvardi and Day, 1997;  
106 Udvardi and Poole 2013; González-Guerrero et al. 2016). A number of proteomic  
107 analyses of the SM have been reported (Wienkoop and Saalbach, 2003, Catalano et al.  
108 2004, Clarke et al. 2015) and although the earlier studies were limited by the lack of  
109 genome sequences for the legumes studied, an array of putative transport proteins  
110 have been identified. An example is LjSST1, a sulphate transporter later shown to be  
111 essential for nitrogen fixation in the *Lotus japonicus*- rhizobia interaction (Krussell et  
112 al. 2005; Schneider et al. 2019).

113

114 The most recent analysis of the soybean SM proteome (Clarke et al. 2015) identified a  
115 protein from the Yellow Stripe-like (YSL) family, Glyma.11G203400 (known then as  
116 Glyma11g31870). YSL proteins are members of the wider oligopeptide transporter  
117 family, generally considered to transport metals chelated to phytosiderophores (PS),  
118 such as deoxymugineic acid and nicotianamine (NA) (Curie et al., 2009). In  
119 monocots, PS excreted to the rhizosphere chelate ferric iron and the complexes are  
120 transported into the plant cytoplasm by YSL transporters. Maize mutants for the first  
121 characterized member of this family show a phenotype of interveinal chlorosis that is  
122 characteristic of iron deficiency and it is this phenotype that gave rise to the name  
123 Yellow-stripe 1 (YS1). YSL proteins, often localized in xylem parenchyma, can also  
124 transport other metal chelates (Dai et al. 2018; Chu et al., 2010; Sasaki et al., 2011,  
125 Zheng et al. 2012) and are important for intracellular iron transport and iron  
126 homeostasis, with both ferric and ferrous-PS complexes transported (Lubkowitz,  
127 2011). YSL proteins are also involved in mobilization of intracellular stores of metals  
128 (Divol et al. 2013, Conte et al. 2013). YSL transporters operate through proton co-  
129 transport driven by the membrane potential (Schaaf et al. 2004) and whether localized  
130 to the PM or internal membranes, transport is always into the cell cytosol (Lubkowitz  
131 2011).

132

133 Despite the biochemical characterization of some members of the YSL family, the  
134 functional role of other members is less clear. In particular, members of one  
135 phylogenetic clade of the YSL family, including YSL5, 7 and 8 (Group III) are not

136 well characterized. A recent study showed that Arabidopsis YSL7 and 8 are  
137 responsible for the import of a *Pseudomonas syringae* virulence factor, syringolin A  
138 (Syl A), into the plant cytoplasm where it inhibits the proteasome (Hofstetter et al.  
139 2013). Syl A is a peptide derivative and peptides of 4-8 amino acids in length were  
140 able to inhibit its transport in plants and in yeast expressing AtYSL7. Consequently, it  
141 was suggested that AtYSL7 and AtYSL8 act as oligopeptide transporters, although  
142 direct evidence of oligopeptide transport was not shown (Hofstetter et al. 2013).

143

144 In this study we show that both AtYSL7 and GmYSL7 (encoded by  
145 Glyma.11G203400) can transport oligopeptides and that the soybean protein, which is  
146 localized to the SM in nodule infected cells, is essential for nitrogen fixation.

147

148

149 **RESULTS**

150 **GmYSL7 is a transporter of the YSL family**

151 In our proteomic study (Clarke et al., 2015) we identified Glyma.11G203400 on the  
152 SM of soybean nodules. The protein is a member of the oligopeptide transporter  
153 (OPT) superfamily (Saier, 2000; Yen et al., 2001; Stacey et al., 2008) and has  
154 significant homology with members of the YSL family (Curie et al. 2009). We named  
155 it YSL7, as its closest Arabidopsis homologue is AtYSL7 (74% amino acid identity  
156 and 85% similarity; Yorden et al. 2011).

157

158 GmYSL7 belongs to a family consisting of 15 members in soybean (Supplementary  
159 Fig. S1; Schmutz et al., 2010) which in phylogenetic analysis fall into the three clades  
160 with both monocots and dicots members (Groups I – III, Supplementary Fig. S1).  
161 Group IV has only monocot members. In Genbank six proteins are annotated as  
162 “probable metal-nicotianamine transporter YSL7” but in the phylogenetic analysis  
163 only GmYSL7, Glyma.11G203400, associates closely with AtYSL7 in Group III, also  
164 clustering with the chickpea protein CaYSL7 (Ca08876) and three *M. truncatula*  
165 proteins (Medtr3g063490 [MtYSL7], Medtr3g063520 [MtYSL9] and Medtr5g091600  
166 [MtYSL8]) (Supplementary Fig. S1). Of the other soybean proteins annotated as  
167 YSL7, Glyma.09G164500 and Glyma.16G212900 are more closely related to  
168 AtYSL5 and AtYSL8, while Glyma.09G281500, Glyma.20G004200 and  
169 Glyma.20G004300, although part of Group III, form a sub-clade not associated with  
170 any YSL proteins from other plants included in the phylogeny (Supplementary Fig.  
171 S1).

172

173 **GmYSL7 is expressed in infected cells of soybean root nodules**

174 Publicly available transcriptomic data for soybean suggests nodule-specific  
175 expression of *GmYSL7* (Severin et al. 2010; Supplementary Fig. S2). We confirmed  
176 this by measuring *GmYSL7* transcript abundance in leaves, roots of 8-day old  
177 seedlings, nodules and denodulated roots of 32-day-old plants using quantitative  
178 reverse transcription (RT-q) PCR. *GmYSL7* transcript was abundant in nodules but  
179 almost undetectable in other plant organs examined (Fig 1A). We investigated the  
180 expression patterns of other YSL genes and all had lower nodule expression than  
181 *YSL7* and transcripts present in other tissues (Supplementary Fig. 2).

182

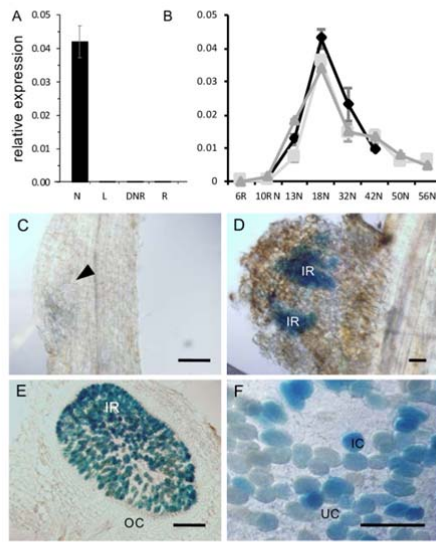

**Figure. 1 GmYSL7 is expressed in infected cells of soybean root nodules.** A. Transcript level of GmYSL7 in tissue samples from different organs. N, nodules; L, leaves; DNR, denodulated roots; R, roots. B. Transcript level of GmYSL7 during nodule development. 6R, roots 6 days after inoculation (DAI); 10RN, roots and nodules 10 DAI; 13N-26N, nodules the indicated DAI. Data shown are for three independent time courses. Bars, SE (n = 3). Nitrogenase activity was first detected at 18 DAI. C. Transgenic root expressing pYSL7:GFP-GUS. GUS staining was not detectable in the very early stages of nodule development. Arrowhead indicates a nodule initiation. D. Transgenic pYSL7:GFP-GUS 10-day-old nodule primordia. IR, infected region. E. Transgenic pYSL7:GFP-GUS mature nodule. GUS staining is restricted to infected cells. OC, outer cortex. F. Magnification of E. Scale bars, 150  $\mu$ m.

183 Expression of *GmYSL7* during nodule development was examined with mRNA  
184 essentially undetectable in young (6 – 10-day-old) inoculated roots; however,  
185 transcript abundance increased sharply before nitrogenase activity was first detected  
186 (day 18; Supplementary Fig. 3), peaking in nodules from 18-day-old plants, and  
187 steadily decreased after this time (Fig. 1B).

188

189 As some characterized YSL proteins are involved in transport of iron complexes we  
190 examined expression of *GmYSL7* in nodules grown under varied (0 – 100  $\mu$ M) added  
191 iron conditions. Two replicates were completed and although the level of expression  
192 was slightly lower in the second (not shown), the pattern of expression was similar.  
193 *GmYSL7* expression was largely insensitive to iron concentration (Supplementary Fig.  
194 3). This was in contrast to an *AtYSL3* homologue with clear upregulation in high iron  
195 conditions (results not shown).

196

197 We investigated *GmYSL7* cellular expression pattern and the subcellular localization  
198 of the expressed protein in nitrogen-fixing nodules. The 2 kb genomic fragment  
199 immediately upstream of the coding region of *GmYSL7* was inserted upstream of a  
200 promoter-less green fluorescent protein- $\beta$ -glucuronidase (GFP-GUS) coding region to  
201 give *pGmYSL7:GFP-GUS*. GUS staining of *pGmYSL7:GFP-GUS* transformed roots

202 and nodules agreed well with our RT-qPCR data, with no staining detectable in roots  
203 or in early nodule initials (Fig. 1C). GUS staining became evident as nodules  
204 developed (Fig. 1D) and was strongest in maturing nodules. In mature nodules, GUS  
205 staining was detected in the infected region and appeared to be confined to rhizobia-  
206 infected cells (Fig. 1E and F). No GUS staining was detected in the outer cortex of the  
207 nodule (Fig. 1E) or in untransformed nodules (data not shown).

208

209 Localization of GmYSL7 on the SM in rhizobia-infected cells was confirmed using  
210 transgenic nodules expressing *pGmLbc3:GFP-GmYSL7* and analysed by confocal  
211 microscopy. FM4-64, a lipophilic dye that fluoresces when bound to membrane (Vida  
212 and Emr, 1995), was used to counterstain the SM (Limpens et al. 2009, Gavrin et al.  
213 2014). GFP-GmYSL7 signal was on internal membranes within infected cells but not  
214 on the PM (Fig. 2B, D). Co-localization of GFP and FM4-64 (Fig. 2A-C) signals  
215 indicates discrete localization of GFP-GmYSL7 on the SM as can be seen also in Fig  
216 2D, with GFP-YSL forming a clear “halo” around the perimeter of symbiosomes. The  
217 GFP-YSL7 fluorescence pattern in infected cells (Fig 2D) was distinct from free GFP,  
218 detected in the cytoplasm (Fig. 2E), and from that of a construct targeted to the  
219 symbiosome space (Fig. 2F).

220

221 Further confirmation that GmYSL7 was localized on the SM and not the PM was  
222 obtained by proteomic analysis of isolated SM and microsomal extract enriched in  
223 PM and endoplasmic reticulum. Approximately six times more peptides from the  
224 well characterized, SM-localized GmNOD26 were in the SM sample compared to the  
225 microsomal membrane sample, indicating enrichment of the SM in the purified  
226 sample. GmYSL7 peptides were only in the purified SM sample (Supplementary  
227 Table 1).

228

### 229 **Silencing of GmYSL7 interrupts development of the symbiosis**

230 Since GmYSL7 is localized to the SM, we investigated whether it is essential for  
231 development of the symbiosis and nitrogen fixation by rhizobia using RNA  
232 interference (RNAi). Nodules from transgenic roots silenced for GmYSL7 were  
233 analyzed 24 days post inoculation (dpi; Fig. 3C). Expression of *GmYSL7* in RNAi  
234 nodules was approximately 40% of the control but expression of the closest  
235 homologs, *Glyma.16G212900 (GmYSL8)* and *Glyma.09G164500 (GmYSL5)*, was not



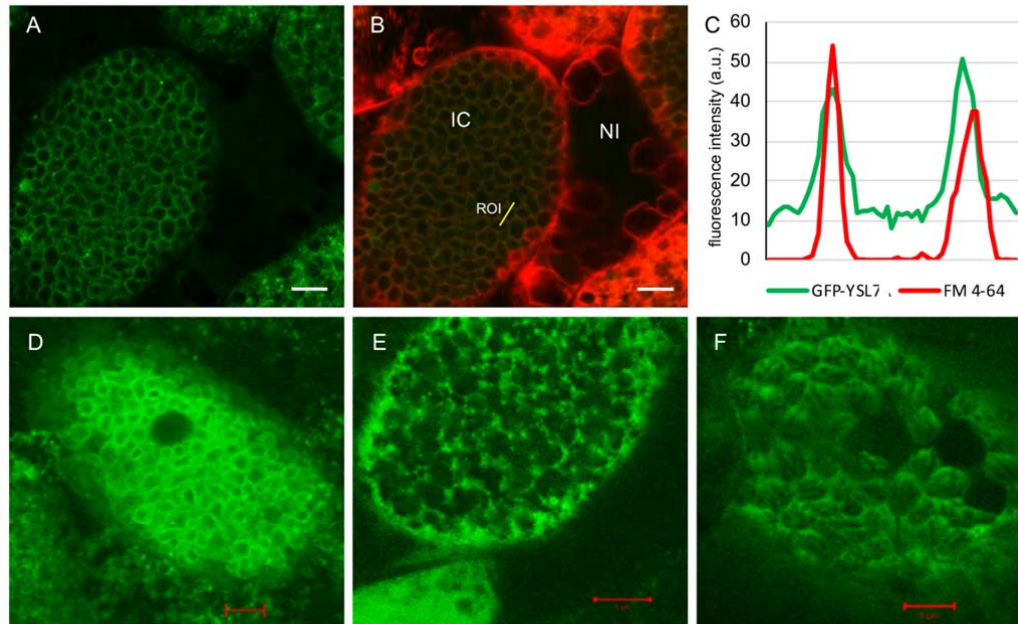

**Figure 2. Localization of GmYSL7 in soybean nodule cells infected with rhizobia.** A. GFP-GmYSL7 localizes on symbiosome membranes in infected cell of soybean nodules. B. Colocalization of GFP-YSL7 with membrane lipophilic dye FM4-64 in the same cell. IC, infected cell; NI, non infected cell; ROI, region of interest. C. Fluorescent intensity plot of ROI from B. D. Superimposed confocal image of GFP-GmYSL7 signal on the symbiosome membrane in rhizobia-infected nodule cells. E. Free GFP localizes to the cytoplasmic spaces surrounding symbiosomes in infected cells. F. MtNOD25-GFP (Hohnjec et al. 2009) localizes to the peribacteroid space inside the symbiosomes. Scale bars, 5 μm.

236 affected (Fig. 3C). Acetylene-reduction analyses showed that nitrogenase activity was  
237 reduced in silenced nodules to only 25% of the activity of control nodules (Figure  
238 3D). *GmYSL7* silenced nodules were smaller (Fig. 3E) and displayed a delay in  
239 development (Fig. 3A, B) in comparison to empty vector control nodules (Fig. 3 G-  
240 H).

241

242 Silencing of *GmYSL7* did not affect bacteria release, but infected cells remained small  
243 and, unlike the control nodules, contained small, single-bacteroid symbiosomes (Fig.  
244 3B). Numerous small vacuoles were localized around the nucleus (Fig. 3F) whereas  
245 control nodules had no vacuoles (Fig. 3H). To pinpoint the developmental stage in  
246 wild type nodules that matches the RNAi nodules we completed an analysis of  
247 nodules from soybean infected with *Bradyrhizobium diazoefficiens* strain 1042-45

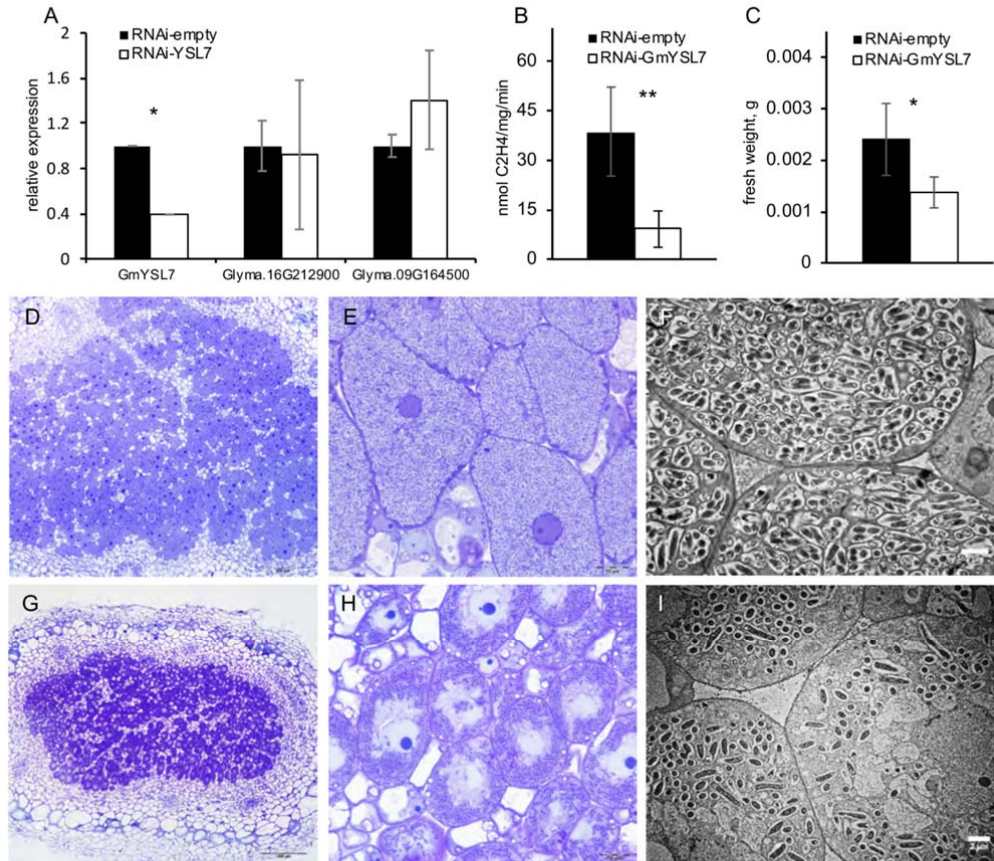

**Figure 3. RNAi silencing of GmYSL7 affects nodule development.** A. Transcript level of GmYSL7 and its closest homologs in 24-day-old nodules of empty vector control and RNAi-GmYSL7 plants (error bars represent SD; n=4; t-test: \*, p<0.05). B. Nitrogenase enzyme activity in 24-day-old nodules of empty vector control and RNAi-GmYSL7 plants (error bars represent SD; n=8; t-test: \*\*, p<0.01). C. Fresh weight of 24-day-old nodules of empty vector control and RNAi-GmYSL7 (error bars represent SD; t-test: \*, p<0.05). D. Longitudinal section of a 24-day-old nodule from an empty vector control plant. E. Magnification of (A) showing developed (stage IV) infected cells. F. Electron microscopy of infected cells of a 24-day-old nodule from empty vector control containing developed multibacteroid symbiosomes. G. Longitudinal section of a RNAi-GmYSL7 24-day-old nodule. H. Magnification of (D) showing undeveloped (stage II) infected cells. I. Electron microscopy of infected cells of a RNAi-GmYSL7 24-day-old nodule containing undeveloped single-bacteroid symbiosomes. Scale bars as indicated.

248 carrying the *lacZ* fusion driven by the *nifD* promoter (Acuña et al., 1987). Four stages  
 249 of development were identified and images can be seen in Supplementary Fig. 4. The  
 250 morphology of infected cells of *GmYSL7*-silenced nodules (Fig. 3B) appeared to be  
 251 arrested at stage II of normal nodule development (Fig. 3F, Supplementary Fig. 4B, F)  
 252 where numerous small vacuoles were present in infected cells and most symbiosomes  
 253 contained single elongated bacteroids. Electron microscopy (EM) of the silenced  
 254 nodules confirmed that the infected cells were small and under-developed, packed  
 255 with symbiosomes containing only a single bacteroid (Fig. 3). Bacteroids appeared

256 elongated as seen in control nodules during stage II (Supplementary Fig. 4F). Infected  
257 cells also contained numerous vacuoles of different sizes and apparent endosomes  
258 fusing with symbiosomes, reminiscent of the formation of a lytic compartment, which  
259 usually occurs during nodule senescence (Fig. 3I). Symbiosomes were isolated from  
260 silenced and control nodules, and this showed that in the silenced nodules,  
261 symbiosomes contained only single bacteroids compared to the control symbiosomes,  
262 which had multiple bacteroids (Supplementary Fig. 4), confirming the phenotype seen  
263 by EM analysis. The results suggest that silencing of *GmYSL7* arrests development of  
264 soybean nodules at stage II.

265

### 266 **RNAseq of nodules in which *GmYSL7* is silenced**

267 We used RNAseq to compare the transcriptome in 22-day old nodules from *GmYSL7*-  
268 RNAi plants and empty vector controls. In these experiments, *GmYSL7* expression in  
269 RNAi plants was around half that of control expression. Principal component analysis  
270 (Fig. 4A) and a heatmap of gene expression of all differentially expressed genes  
271 shows clear differences between the RNAi and control samples (Fig. 4B). There were  
272 no significant changes in expression of other YSL genes.

273

274 There were 924 genes with  $\log_2$ fold change of 1 or greater in nodules in which YSL7  
275 was silenced, while 1180 genes had  $\log_2$ fold change of -1 or greater (with adjusted p-  
276 value  $<0.05$ ). Gene ontology (GO) enrichment analysis showed that genes involved  
277 in defence responses (e.g. defence response to bacterium, defence response to other  
278 organism), “negative regulation of endopeptidase activity” and a network associated  
279 with iron homeostasis, sequestration and transport, are overrepresented in the  
280 upregulated genes (Fig. 4C). A network of genes with GO terms associated with  
281 regulation of transcription and signal transduction, and another including those  
282 associated with lipid biosynthesis, are overrepresented in the downregulated  
283 transcripts (Fig. 4D).

284

285 Details of expression of particular genes in the RNAi and control nodules are  
286 available in Supplementary Table 2. Among the genes with significantly higher  
287 expression in the silenced nodules were those encoding homologues of a senescence-  
288 associated gene 13 (Glyma.12G059200), NRT1.8/NPF7.2 (proton-coupled H<sup>+</sup>/K<sup>+</sup>  
289 antiporter, Glyma.18G260000), organic cation/carnitine transporter4

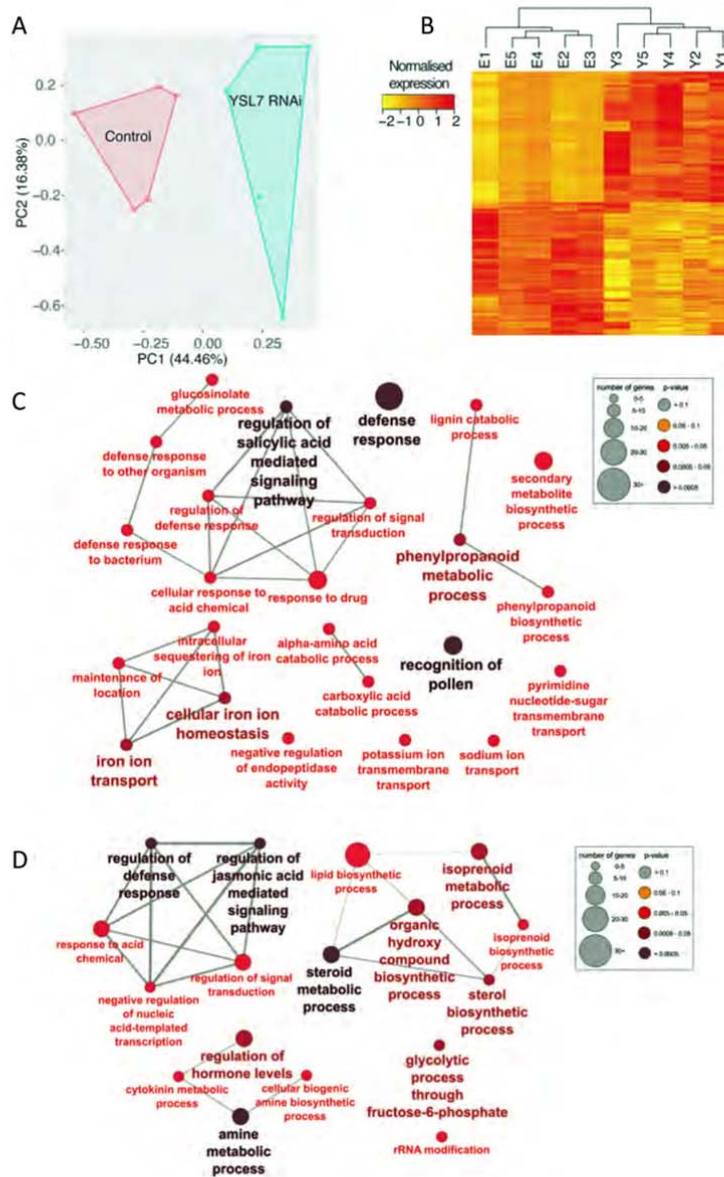

**Figure 4. RNAseq analysis of *GmYSL7*-RNAi nodules.** A. Principal component analysis of RNAseq samples. B. Heatmap of clustering of differentially regulated genes in each nodule sample. C, D. Gene Ontology enrichment analysis of biological processes in up (C) and down (D) regulated genes from *GmYSL7* RNAi nodules. GO term enrichment analyses were performed using the ClueGO v2.5.5 plugin (Bindea et al., 2009) in Cytoscape v3.5.1 (Shannon et al., 2003). Circles represent an enriched group of genes based on their GO terms. Circle size and colour indicate the number of mapped genes and associated Term PValue corrected with Bonferroni step down.

290 (Glyma.12G216400), ferritin (Glyma.01G124500, Glyma.11G232600,  
 291 Glyma.03G050100), vacuolar iron transporter-like proteins (Glyma.05G121200,  
 292 Glyma.08G076000), plantacyanin (Glyma.08G128100), a copper transport protein  
 293 (Glyma.09G179800), cation efflux family protein (Glyma.08G164800), a cationic

294 amino acid transporter 2 (Glyma.19G116500), nitrate transporter 2.4  
295 (Glyma.11G195200) and a number of protease inhibitors (Supplementary Table 2).

296

297 Genes with significantly lower expression in the *GmYSL7* silenced nodules were those  
298 encoding homologues of sucrose-proton symporter 2 (Glyma.16G156900), glutamine  
299 dumper 2 (Glyma.18G277600), nicotianamine synthase 1 (NAS, Glyma.15G251300),  
300 GmNIC1a (Glyma.12G208900), a Clavata3/ESR (CLE) related homologue, and  
301 Putative lysine decarboxylase family protein (Supplementary Table 2).

302

303

### 304 **GmYSL7 transports oligopeptides and Syringolin A but not Fe(II)-NA**

305 Yeast complementation was used to try to identify a substrate for GmYSL7. Initially  
306 we tested for transport of Fe(II)-NA by complementation of the *fet3/fet4/ptr1* mutant;  
307 however, although the positive control *ZmYSI* (Curie et al. 2001, Schaaf et al. 2004)  
308 complemented the mutant, *GmYSL7* and *AtYSL7* did not (Fig. 5).

309

310 Since the YSL family is part of the wider oligopeptide transporter (OPT) family, we  
311 next tested whether GmYSL7 could complement the yeast oligopeptide transport *opt1*  
312 mutant, using different oligopeptides as the sole source of nitrogen for growth.  
313 When the transformants were grown with four (ALAL, LSKL), five (IIGLM) and six  
314 (KLLLLG) amino acid peptides as the only N source, cells expressing *AtYSL7*,  
315 *GmYSL7* or *AtOPT4*, but not with the empty vector pDR196, grew (Fig. 6). On  
316 media containing larger peptides (eight, ten or twelve amino acid), the growth of the  
317 transformants was more varied. *AtOPT4* supported growth on the eight amino acid  
318 peptide DRVYIHPF, while growth was weak for *AtYSL7* and *GmYSL7*. Growth on  
319 the 10 amino acid peptides DRVYIHPFHL was close to background for all  
320 transformants, but all grew better than vector control on the 12 amino acid peptide  
321 RLAPEGDPDHHN (Fig 6) which corresponds to the mature CLE peptide, GmRIC1a  
322 (encoded by Glyma.13G292300; Hastwell et al. 2015).

323

324 *AtYSL7* is involved in syringolin A (SylA) uptake and, when expressed in yeast,  
325 exposure to SylA inhibited growth (Hofstetter et al. 2013, Fig. 7) suggesting the  
326 transporter mediated uptake of this toxic peptide derivative. We used this assay to test  
327 for transport of SylA by *GmYSL7*. *GmYSL7*, *AtYSL7* and the empty vector pDR195

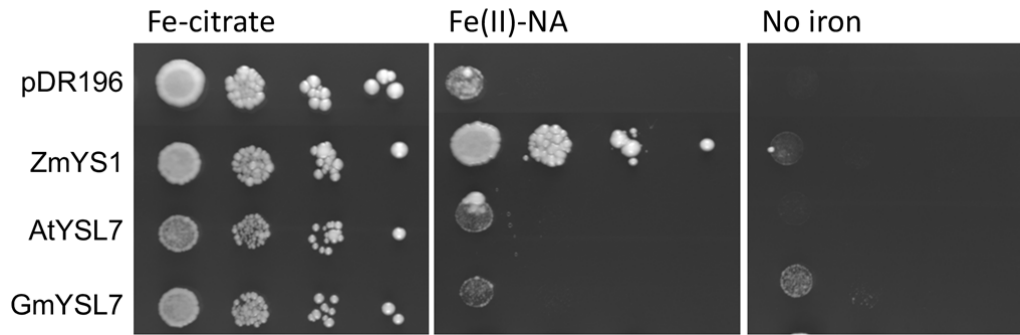

**Figure 5. GmYSL7 does not transport Fe(II)-nicotianamine (NA).** DEY1530 yeast (*fet3/fet4/ftr1*) was transformed with the empty vector plasmid pDR196, *AtYSL7*, *GmYSL7*, *ZmYS1* in pDR196-GW. Serial dilutions of each yeast transformant were applied to SD plates (that include 1.6  $\mu\text{M}$   $\text{FeCl}_3$ ) with 10  $\mu\text{M}$  Fe-citrate, Fe(II)-NA or no added iron (no iron) and the plates grown for 3-5 days.

328 were expressed in the yeast *pdr5* mutant, that lacks the ABC transporter PDR5, and  
329 plated as a lawn (Hofstetter et al., 2013). When a disk containing SylA was placed on  
330 the plate, growth of yeast expressing GmYSL7 and AtYSL7, but not the empty vector  
331 pDR195, was inhibited. Inhibition of growth caused by SylA on the AtYSL7 plate  
332 showed as clear patches on the plate for all concentrations of SylA tested, while  
333 inhibition of yeast expressing GmYSL7 was weaker (Fig. 7).

334

### 335 **GmYSL7 and MtYSL7 are functionally equivalent**

336 In the accompanying manuscript (Castro-Rodríguez et al. 2020), MtYSL7, which is  
337 localized on the PM in the vasculature and nodule cortex in *Medicago truncatula*, is  
338 described. To determine whether GmYSL7 and MtYSL7 proteins play similar roles in  
339 the different cell types in which they are located, we expressed *GmYSL7* in the *Mtysl7*  
340 mutant. Expression was driven by the *MtYSL7* promoter to ensure expression in the  
341 cells in which MtYSL7 is present (vasculature and nodule cortex but not infected  
342 cells). Although GmYSL7 localizes to the SM in soybean, it was able to complement  
343 the *Mtysl7* transposon insertion mutant to restore nitrogenase activity to wild type  
344 levels and increase the dry weight of the transformed plants compared to the mutant  
345 (Fig. 8). Based on this result, we assume that in the *Mtysl7* mutant, when expressed in  
346 the cells where MtYSL7 is normally active, GmYSL7 at least partially localizes to the  
347 PM.

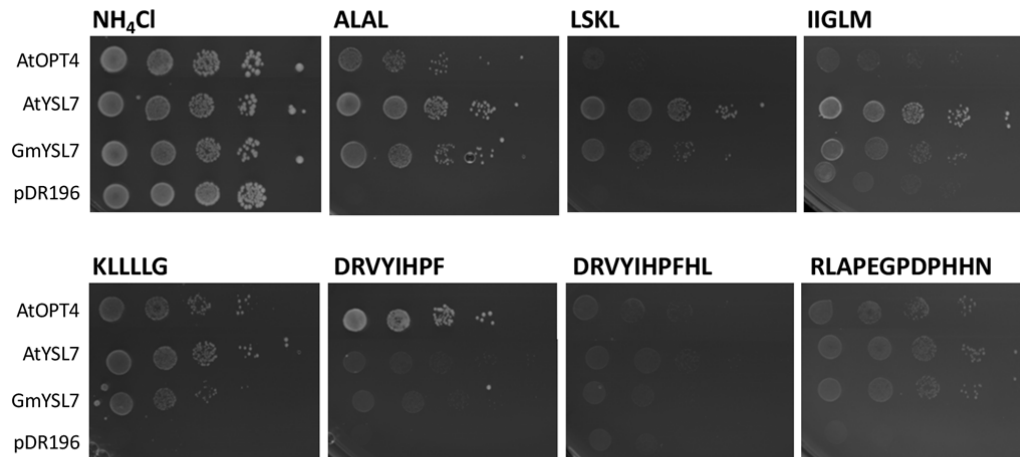

**Figure 6. GmYSL7 and AtYSL7 transport oligopeptides.** *AtOPT4*, *AtYSL7*, *GmYSL7* in pDR196-GW and the empty vector (pDR196) were introduced into the yeast *opt1* mutant, Y11213. Serial dilutions of each transformant were grown as above on minimal medium containing either 10 mM NH<sub>4</sub>Cl (positive control) or 100 μM peptide (with sequence as indicated) as the sole source of nitrogen

348

349

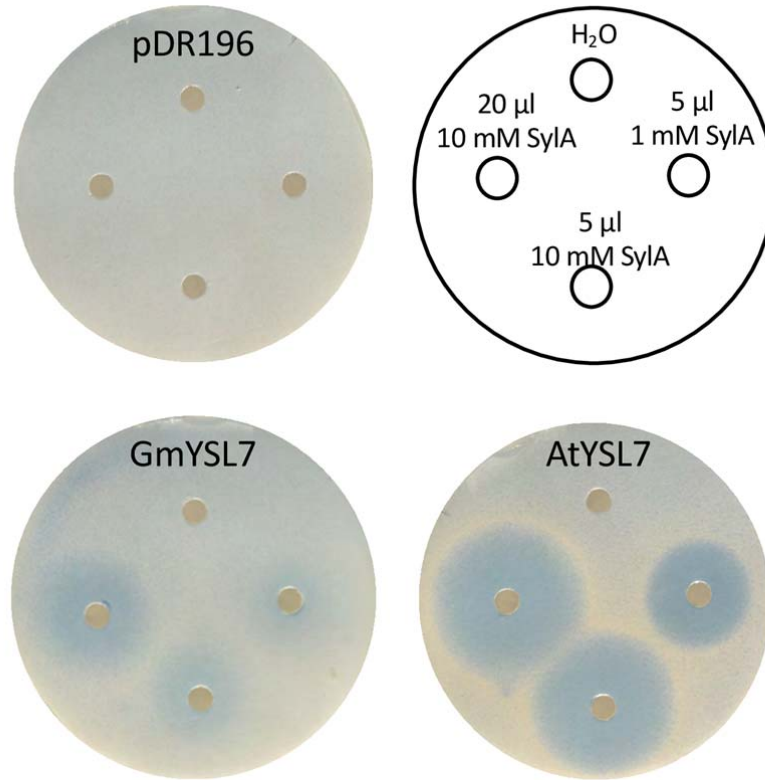

**Figure 7. GmYSL7 transports Syringolin A.** BY4742 yeast *Δpdr5:KanMX6* transformed with the empty vector (pDR196) or the vector expressing *AtYSL7* or *GmYSL7* were plated as a lawn on solid synthetic defined (SD) media. Filter disks with the indicated SylA solutions were placed onto the plates and inhibition of growth examined after 2 days.

## 350 DISCUSSION

351 We have characterized a member of the YSL family, GmYSL7, in soybean. The  
352 protein is part of a clade of YSL proteins (Group III) that includes *AtYSL5*, *AtYSL7*  
353 and *AtYSL8*. *AtYSL7* and 8 are involved in transport of the *Pseudomonas syringae*  
354 virulence factor into Arabidopsis cells across the PM (Hofstetter et al. 2013), but their  
355 physiological role in plants has not been determined. GmYSL7, *AtYSL7*, *CaYSL7*  
356 and three *Medicago truncatula* proteins (*MtYSL7*, 8 and 9) form a cluster in  
357 phylogenetic analyses, but the soybean protein's expression profile is distinct from  
358 that of *AtYSL7* and *MtYSL7*. *AtYSL7* is expressed mainly in flowers but also in  
359 siliques and roots. *MtYSL7*, has highest expression in nodules, but is also expressed in  
360 roots. Soybean, on the other hand, appears to lack a *YSL7* paralog with expression



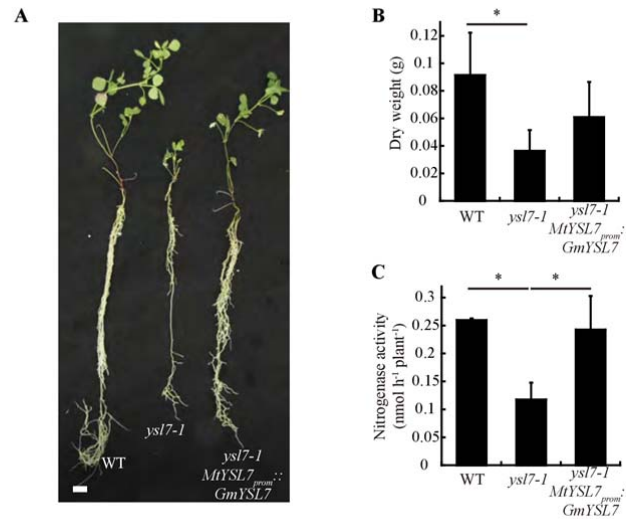

Fig. 8. GmYSL7 is functionally equivalent to MtYSL7. A) Growth of representative wild type (WT), *ysl7-1*, and *ysl7-1* transformed with *GmYSL7* controlled by the *MtYSL7* promoter (*ysl7-1* *MtYSL7<sub>prom</sub>::GmYSL7*). Bar = 1 cm. B) Dry weight of 28 dpi WT, *ysl7-1*, and *ysl7-1* *MtYSL7<sub>prom</sub>::GmYSL7* plants. Data are the mean  $\pm$  SE of 5 transformed plants. C) Nitrogenase activity of 28 dpi WT, *ysl7-1*, and *ysl7-1* *MtYSL7<sub>prom</sub>::GmYSL7* plants. Acetylene reduction was measured in duplicate from two sets of three-four pooled plants. Data are the mean  $\pm$  SE. \* indicates statistically significant differences ( $p < 0.05$ )

361 similar to *AtYSL7* and *MtYSL7*. Rather, *GmYSL7* expression is linked specifically to  
362 symbiotic nitrogen fixation, occurring only in infected nodule cells where the protein  
363 is present on the SM, but not the PM, in contrast to *AtYSL7* and *MtYSL7*.  
364 Furthermore, its expression is only marginally affected by the iron concentration of  
365 the growth medium (Fig S4). This seems a clear example of neofunctionalization  
366 with the loss of the paralog (Xu et al. 2017). Either there is no requirement in soybean  
367 for the role played by *AtYSL7* in other organs or another soybean gene with  
368 functional redundancy fulfills that role. The closest homologues of *GmYSL7*,  
369 *Glyma.16G054200* (*GmYSL8*) and *Glyma.19G094800* (*GmYSL5*) are expressed in  
370 almost all tissues (Fig. S2), but we know nothing about their function at this stage.

371

372 An important role for *GmYSL7* in nitrogen-fixing nodules is shown by knockdown of  
373 its expression, which resulted in smaller nodules and a decrease in nitrogenase  
374 activity. The *GmYSL7* RNAi nodules appear to have been developmentally arrested,  
375 with small symbiosomes that contain only one bacteroid, in contrast to the large

376 symbiosomes containing multiple bacteroids in infected cells of control nodules. The  
377 *GmYSL7* RNAi infected cell ultrastructure is similar to control nodules in the early  
378 stages of development. This suggests that the activity of *GmYSL7* – and the  
379 substrate(s) it transports across the SM - is important for the continued development  
380 of the symbiosis and maturation of infected cells.

381

382 Our results show clearly that *GmYSL7* transports a range of small peptides. When  
383 considering the activity of SM transporters, it is important to bear in mind the  
384 orientation and energization of the SM (Udvardi and Day, 1997), as this influences  
385 the direction that any given substrate is transported. A P-type ATPase on the SM  
386 together with the rhizobial electron transport chain, pump protons into the  
387 symbiosome space, creating an electrochemical gradient across the SM, with the  
388 membrane potential positive on the inside and the interior of the symbiosome  
389 (symbiosome space) acidic (Udvardi and Day, 1997). All YSL proteins characterised  
390 to date transport compounds across cell membranes into the cytoplasm (Lubkowitz  
391 2011), with proton symport the most likely mechanism (Schaaf et al. 2004).  
392 Assuming that *GmYSL7* has a similar mechanism, it is consequently likely to  
393 transport its peptide substrate out of the symbiosome and into the plant cell cytosol.  
394 The phenotype seen in *GmYSL7*-RNAi nodules is, therefore, related to the lack of  
395 provision of this substrate to the plant cell.

396

397 The *Medicago truncatula* homologue of *GmYSL7*, *MtYSL7*, is characterized in an  
398 accompanying manuscript and although it is not localized on the SM, the *Mtysl7*-  
399 mutant has a phenotype that also affects the symbiosis and nitrogen fixation (Castro-  
400 Rodríguez et al. 2020). The difference in cellular localization might be explained by  
401 the fact that *M. truncatula* produces indeterminate nodules, where the meristem  
402 continues to be active throughout development, and soybean determinant nodules, in  
403 which mature nodules have no meristem. As well as structural differences the  
404 different nodule types have a number of metabolic differences including in the  
405 mechanism for nitrogen assimilation and the compounds transported from the nodules  
406 (Smith and Atkins, 2002). However, *GmYSL7* is functionally equivalent to *MtYSL7*  
407 because it complemented the *Mtysl7-1* mutant, restoring nitrogenase activity and  
408 growth in low N conditions. This suggests that the two YSL7 proteins are able to  
409 transport the same substrate/s and that while *MtYSL7* brings this substrate into the

410 cell across the PM, GmYSL7 moves its substrate out of the symbiosome and into the  
411 cytosol.

412

413 The fact that *GmYSL7* complements the *Mtysl7* mutant also suggests that the  
414 mechanism for targeting the GmYSL7 protein to the PM in non-infected cells (where  
415 it is expressed from the *MtYSL7* promoter) must be modified in infected cells to allow  
416 it to reach the SM. This could involve a chaperone specific to the infected cell but  
417 might also be related to the fact that the SM is initially derived from the PM (Brear et  
418 al. 2013, Mohd-Noor et al. 2015).

419

420 In contrast to many other YSL proteins, neither of the legume YSL7 proteins, nor that  
421 from Arabidopsis, were able to transport Fe(II)-NA (this study, Castro-Rodríguez et  
422 al. 2020 accompanying manuscript). Additionally MtYSL7 could not transport  
423 Fe(III), zinc or copper complexed with NA (Castro-Rodríguez et al. 2020,  
424 accompanying manuscript). On the other hand, complementation of the yeast *opt1*  
425 mutant showed that the three proteins could transport oligopeptides of various sizes,  
426 including a CLE peptide, GmRIC1a. Like AtYSL7, when expressed in yeast,  
427 GmYSL7 could also transport syringolin A, a peptide derivative that is the virulence  
428 factor for *Pseudomonas syringae* (Hofstetter et al. 2013). Inhibition of yeast growth  
429 caused by the transported SylA was not as strong as for AtYSL7 suggesting that  
430 GmYSL7 may not transport it as effectively or have the same specificity for the  
431 compound. In our assays for direct uptake of oligopeptides in yeast, both AtYSL7 and  
432 GmYSL7 supported growth on media with oligopeptides of 4-6 and 12 amino acids as  
433 their sole N source, but there was little growth when the 8 amino acid peptide,  
434 DRVYIHPF was used, despite its ability to reduce the effect of SylA on Arabidopsis  
435 roots (Hofstetter et al., 2013). MtYSL7 was also identified as an oligopeptide  
436 transporter and showed similar specificity for oligopeptides to AtYSL7 and GmYSL7  
437 (Castro-Rodríguez et al., 2020 accompanying manuscript).

438

439 While it is clear that YSL7 proteins are peptide transporters, their physiological role  
440 in legumes is not clear. Glutathione is a three amino acid peptide derivative found in  
441 nodules and bacteroids but as MtYSL7 cannot transport GSH (Castro-Rodríguez et al.,  
442 2020 accompanying manuscript) and GmYSL7 is able to replace the function of  
443 MtYSL7, it is unlikely that transport of GSH out of the symbiosome is the

444 physiological role of GmYSL7. The symbiosome contains a number of proteases on  
445 the SM and in the symbiosome space (peribacteroid space; Clarke et al. 2015) and  
446 appears to act like a vacuole containing large amounts of free peptides (Clarke et al.  
447 2015). Some of these could be substrates for GmYSL7, but why blocking their exit  
448 from the symbiosome would inhibit N-fixation and symbiosome development to such  
449 an extent is not obvious. While it is possible that GmYSL7 acts to scavenge N by  
450 transporting peptides from the symbiosome space into the plant cytosol, it is unlikely  
451 that this would have such a profound effect on nodule development.

452

453 It is tempting to speculate that release of peptides from the symbiosomes has a more  
454 direct role in manipulating plant gene expression and organogenesis. Cyclic peptides  
455 act as signaling molecules in some symbioses (Abbamondi et al. 2014) and it is  
456 possible that GmYSL7 transports an oligopeptide derivative produced in the  
457 bacteroids. In this scenario, release of the oligopeptide signal could be required to  
458 relieve plant inhibition of bacteroid division or as a positive signal for symbiosome  
459 development. Supporting this idea is the fact that a protein annotated as an  
460 oligopeptide transporter was specifically induced in symbiotic *Bradyrhizobium*  
461 *japonicum* (Pessi et al. 2007) and a number of transcription factors are upregulated in  
462 nodules of *GmYSL7* RNAi plants.

463

464 We used RNAseq of GmYSL7-RNAi nodules to investigate further the effects of  
465 inhibiting transport by GmYSL7. Overrepresented GO terms in the downregulated  
466 genes include a range of terms associated with lipid metabolic processes (lipid  
467 biosynthetic process, isoprenoid metabolic process). It is likely that this relates to the  
468 failure of the symbiosome to develop with multiple bacteroids. The change from a  
469 single bacteroid symbiosome to one with multiple bacteroids is likely to require  
470 synthesis of large amounts of lipid. With development of the infected cell blocked at  
471 an early stage this synthesis would not be required.

472

473 Overrepresented terms in the upregulated genes included “defense response”,  
474 “defense response to bacteria”, “defense response to other organism” and “regulation  
475 of defense response”, suggesting that blocking transport by GmYSL7 causes a general  
476 defense response against the rhizobia. This may be an indirect effect of a decrease in  
477 nitrogen fixation, with the plant sanctioning the bacteria for not doing its job (Kiers et

478 al. 2003). Upregulation of Glyma.11G195200, a soybean homologue of AtNRT2.4, a  
479 nitrate transporter that is upregulated in response to nitrogen starvation, suggests that  
480 as nitrogenase activity was reduced, the nodules in *YSL7*-RNAi plants were indeed  
481 nitrogen starved.

482

483 In relation to oligopeptide transport, the gene encoding the CLE peptide GmNIC1a is  
484 downregulated (9.3-fold lower) in the RNAi nodules. This peptide is responsible for  
485 regulation of nodulation in response to nitrate and its expression is induced by nitrate.  
486 Over-expression of the peptide reduces nodulation (Reid et al. 2011), so lower  
487 transcript levels might be expected to favour nodule formation and development. It is  
488 interesting that *YSL7* can transport GmRIC1a, a homologue of GmNIC1a. It is  
489 possible that GmRIC1a or a structurally similar peptide is synthesised in the  
490 symbiosome and exported via *YSL7* to the plant cytosol where it influences nodule  
491 development. This would explain the arrested development of nodules in which *YSL7*  
492 is silenced. If a GmRIC1a-like peptide is a substrate for GmYSL7, then blocking its  
493 transport may also affect expression of GmNIC1a gene. In addition to this, the GO  
494 term “negative regulation of endopeptidase activity” is overrepresented with higher  
495 expression of four protease inhibitors in the RNAi nodules. This may suggest that the  
496 peptide transported by *YSL7* is processed in the plant cell and blocking its transport  
497 leads to expression of inhibitors of proteases.

498

499 Another group of GO terms that are overrepresented in the upregulated genes in  
500 GmYSL7-RNAi nodules are “intracellular sequestering of iron ion”, “iron ion  
501 transport” and “cellular iron ion homeostasis”. Some of the genes associated with  
502 these terms include ferritins and vacuolar iron transporter (VIT) gene homologues.  
503 This is accompanied by upregulation of a number proteins potentially associated with  
504 metal transport (Cu transport protein, cation efflux family protein, MATE efflux  
505 family protein) and a transcription factor, WRKY9, associated with a GO term  
506 “cellular response to iron ion starvation”. This suggests that metal homeostasis is  
507 dysregulated in the *YSL7*-RNAi nodules in a similar manner to that seen in *Mtysl7-2*,  
508 where iron and copper concentrations are increased in nodules (Castro-Rodríguez et  
509 al. 2020). There are two possible explanations for this. If symbiosome development is  
510 stalled and nitrogen fixation blocked, then metals being supplied to the symbiosome  
511 by the plant may accumulate in the nodules and need to be sequestered to avoid

512 cellular damage. This may result in storage, particularly of iron, in uninfected cells  
513 with ferritin, or transport into the vacuole via VIT proteins.

514

515 Another intriguing effect of the silencing of YSL7 is the downregulation (16-fold  
516 decrease) of Glyma.15G251300, a gene encoding NAS, responsible for synthesis of  
517 NA, a PS involved in metal transport by YSLs. This is further evidence that YSL7  
518 silencing affects iron homeostasis in the plant (see above). It is also possible that the  
519 downregulation in YSL7-RNAi nodules is due to changes in activity of another YSL  
520 transporter involved in metal supply to the nodule, but there do not appear to be  
521 significant changes in expression of other YSL genes in the RNAi nodules. However,  
522 it is also possible that the changes in expression of these genes are simply a  
523 consequence of the block in nodule development that occurs in nodules where YSL7  
524 is silenced. Further work is required to definitively answer this.

525

526 Another explanation is that GmYSL7 plays a more direct role in metal ion  
527 homeostasis, in line with the role proposed by Castro-Rodríguez et al. (2020,  
528 accompanying manuscript). If GmYSL7 transports a peptide that signals cellular  
529 metal concentrations, then when transport of the peptide ceases the plant may not be  
530 able to sense the metal status of the symbiosome, resulting in an iron starvation  
531 response in which transcription factors, among them WRKY9, are expressed and  
532 upregulate metal transporters, increasing iron transport to the nodules. If  
533 simultaneously symbiosome development stalls, these metals may accumulate outside  
534 the symbiosome, requiring storage in other forms, such as ferritin. Further study is  
535 required to validate these proposals, including the identification of the peptide  
536 substrate for GmYSL7.

537

## 538 **Conclusion**

539 We have identified a member of the oligopeptide transporter family, GmYSL7, which  
540 is localized to the symbiosome membrane in nitrogen-fixing soybean nodules. It  
541 transports an array of small oligopeptides out of the symbiosome and into the plant  
542 cell cytosol, and its disruption arrests infected cell development and symbiosome  
543 maturation, inhibiting nitrogen fixation. It affects expression of a number of genes  
544 involved in plant defense responses and in iron homeostasis. It is also able to rescue a

545 *M. truncatula* mutant, in which the equivalent gene is compromised, indicating  
546 conserved function across the two legumes.  
547  
548

549 **METHODS**

550 **Plant Growth Conditions**

551 *Glycine max* L. cv Stevens (soybean) seeds were inoculated at planting and one week  
552 after planting with *Bradyrhizobium diazoefficiens* (Soybean group H, New Edge  
553 Microbials). Plants were grown as described in Clarke et al. (2015) and fertilized once  
554 a week with a nitrogen-free B&D nutrient solution (Broughton and Dilworth 1971).  
555 Nitrogenase activity in nodules was assessed using an acetylene reduction assay as  
556 described by Unkovich et al. (2008).

557

558 For limited and excess iron conditions plants were grown in B&D solution with 0, 1,  
559 10 (control concentration) or 100  $\mu$ M Fe-citrate, which was renewed every 2 days to  
560 maintain pH and stable nutrient supply. Two biological replicates were done. Fe status  
561 was determined by elemental analysis (Lee M, School of Land and  
562 Environment, University of Melbourne) using the Perchloric Nitric Acid Method. 15  
563 plants per treatment were analyzed to determine shoot iron content using an  
564 Inductively Coupled Plasma Optical Emission Spectrometer (Varian Medical  
565 Systems, Palo Alto, CA, USA).

566

567 **Cloning and Constructs**

568 Genomic DNA for cloning the *GmYSL7* promoter was extracted from mature soybean  
569 leaves using DNeasy Plant minikit (Qiagen). RNA was extracted from plant tissues  
570 using an RNeasy Plant mini kit (Qiagen) and cDNA synthesized using an iScript  
571 cDNA synthesis kit (Invitrogen). All constructs were PCR amplified from soybean  
572 nodule cDNA or gDNA using either Platinum Pfx50 (Invitrogen) or Phusion (Thermo  
573 Fisher Scientific) high fidelity polymerases and cloned using the Gateway cloning  
574 system (Invitrogen). A list of primers used can be found in Supplementary Table 3.

575

576 For *GmYSL7* promoter GUS fusion constructs, a 2 kb genomic fragment immediately  
577 upstream of the *GmYSL7* coding region was recombined into either pKGW-GGRR  
578 (Gavrin et al. 2016) or pKGWFS7 (Karimi et al., 2002). The full-length coding  
579 sequence of *GmYSL7* was recombined into pGmLBC3-pK7GWIWG2 Gateway  
580 vector (Gavrin et al. 2016) to create a hairpin RNAi vector for silencing the gene. N-  
581 terminal GFP fusion constructs for *GmYSL7* were constructed from the full-length  
582 coding sequence recombined into either pGmLBC3-pK7WGF2-R (Gavrin et al. 2016)



583 or a modified pK7WGF2 (pGmLBC3-pK7WGF2) where the 35S promoter is  
584 replaced by the GmLBC3 promoter. The free GFP construct was made by *EcoRV*  
585 digestion and re-ligation of the pGmLBC3-pK7WGF2 vector to remove the  
586 intervening Gateway cassette. For the symbiosome space GFP construct, MtNOD25  
587 (Hohnjec et al. 2009) was PCR amplified from *M. truncatula* cDNA and recombined  
588 with pGmLBC3-pK7WGF2. For yeast expression, full length open reading frames of  
589 GmYSL7, AtYSL7, AtIRT1, AtOPT4 and ZmYS1 inserted into the pDR196GW  
590 vector.

591

592 The GmYSL7 coding sequence was synthesised with the MtYSL7 promoter and  
593 flanked by attL recombination sites inserted in the pUC57 (Synbio). The construct  
594 was recombined into pGBW13 using Gateway Cloning technology.

595

#### 596 **Transformation of Soybean and Medicago**

597 Hairy root transformation of soybeans (cv Stevens) used *Agrobacterium rhizogenes*  
598 K599 and was as described by Mohammadi-Dehcheshmeh et al. (2014). Transformed  
599 roots were inoculated with *B. diazoefficiens* CB1809 (Becker Underwood, Somersby,  
600 NSW, Australia). Plants were grown under controlled temperature and lighting  
601 conditions (26°C day, 24°C night; 16 hr day; 120-150  $\mu\text{mol m}^{-2} \text{s}^{-1}$ ). Transformed  
602 nodules were examined 2-4 weeks post inoculation.

603

604 Transformation of *Medicago truncatula* was as described by Boisson-Dernier et al.  
605 (2001) using *A. rhizogenes* ARqual.

606

#### 607 **Microscopy**

608 Confocal imaging of GFP-fusion proteins was done on transgenic nodules either hand  
609 sectioned or sectioned in low melt agarose using a vibratome (752M Vibroslice,  
610 Campden Instruments, Loughborough, Leics., UK). In some instances, nodules were  
611 counterstained by FM4-64 (30  $\mu\text{g/ml}$ ). Nodule sections were immediately imaged as  
612 described previously (Limpens et al., 2009) using either an LSM Pascal 410 (Zeiss) or  
613 an SP5 II (Leica) confocal laser-scanning microscope.

614

615 Imaging of GUS expression was done as described in Clarke et al. (2015). Sections  
616 were either counterstained with ruthenium red or mounted directly in Milli-Q water,

617 and imaged using an Axiophot epifluorescence microscope with a set of Achroplan  
618 objective lens (Zeiss).

619

620 The protocol for tissue preparation for light and EM has been described previously  
621 (Limpens et al., 2009). Semithin sections (0.6  $\mu\text{m}$ ) for light microscopy and thin  
622 sections (60 nm) for EM of transgenic nodules were cut using a Leica Ultracut  
623 ultramicrotome UC7 (Leica). Sections were collected on 400 mesh nickel grids and  
624 examined using a Jeol JEM 1400 transmission electron microscope (Jeol Ltd, Tokyo,  
625 Japan).

626

### 627 **Quantitative Reverse Transcription-PCR**

628 RT-qPCR assays were used to measure transcript abundance in soybean tissues of  
629 control and YSL7 RNAi plants grown in sand or hydroponics. cDNA was  
630 synthesized from 500 ng total RNA using Iscript reverse transcriptase (Bio-Rad,  
631 Hercules, CA, USA), according to manufacturer's instructions. Quantitative real time  
632 PCR assays were done in a volume of 5  $\mu\text{l}$  in triplicate and contained 1  $\mu\text{l}$  of cDNA  
633 diluted 1/5, 1 X LightCycler® 480 SYBR green I mix (Roche Applied Science, Castle  
634 Hill, Australia) and 0.5  $\mu\text{M}$  of each primer (GmYSL7 and GmUBI3 QRT primers;  
635 Supplementary Table 3). Assays were done using a LightCycler® 480 (Roche  
636 Applied Science) and the following conditions: 95°C 10 min, 45 cycles of 95°C 10 s,  
637 56°C 10 s, 72°C 20 s, followed by ramping the temperature from 55°C to 95°C for  
638 melt curve analysis. PCR efficiency for each primer pair was determined using the  
639 LinRegPCR software (Ramakers et al., 2003) and data analysed using the  
640 LightCycler® 480 software package (Roche Applied Science). Data were normalized  
641 using *GmUBI3* (Glyma20g27950; Trevaskis *et al.*, 2002) or *cons6* expression (Libault  
642 et al., 2008). Stable *GmUBI3* expression in the tissues examined in this study was  
643 confirmed through comparison of its expression with five characterized soybean  
644 reference genes (*cons4*, 6, 7, and 15; Libault et al., 2008) using geNorm software  
645 (Vandesompele et al., 2002). The amplified product from the real-time reaction was  
646 cloned and sequenced to confirm the specificity of the amplification product.

647

### 648 **Yeast complementation**

649 To test for transport of Fe(II)NA AtYSL7, GmYSL7, ZmYS1 in pDR196GW and the  
650 empty vector were introduced into the yeast *fet3/fet4/ftr1* mutant (Spizzo et al. 1997;

651 DEY1530: *MATa ade2 his3 leu2 lys2 trp1 ura3 fet3-2::HIS3 fet4-1::LEU2*  
652 *ftr1D1::TRP1*) using the method described by Dohmen et al. (1991). Fe(II)-NA plates  
653 were prepared by mixing 15  $\mu$ l 10 mM FeSO<sub>4</sub> in 200 mM MES/Tris pH 7.4 with 250  
654  $\mu$ l 200 mM Na-ascorbate and 8  $\mu$ l of 50 mM NA and heating at 65°C for 10 minutes  
655 to produce a clear solution that was added to 25 ml of SD media to produce the Fe(II)-  
656 NA plate. Transformants were grown in liquid media to an OD<sub>600</sub> of 1 and then  
657 serially spotted in ten-fold dilutions on either SD plates with no added iron, Fe(II)-NA  
658 plates or SD-plates with 10  $\mu$ M Fe-citrate.

659

660 For the peptide transport assay AtOPT4, AtYSL7, GmYSL7 in pDR196GW and the  
661 empty vector were introduced into the yeast *opt1* mutant (Y11213: BY4742; *MATa*;  
662 *ura3 $\Delta$ 0*; *leu2 $\Delta$ 0*; *his3 $\Delta$ 1*; *lys2 $\Delta$ 0*; *YJL212c::kanMX4*, Euroscarf). Transformants were  
663 grown as above on minimal medium (0.17% YNB without amino acids and  
664 (NH<sub>4</sub>)<sub>2</sub>SO<sub>4</sub>, supplemented with amino acids as required, and containing either 10 mM  
665 NH<sub>4</sub>Cl (positive control) or 100  $\mu$ M of the following peptides, ALAL, LSKL, IIGLM,  
666 KLLLLG, DRVYIHPF, DRVYIHPFHL or RLAPEGPDPHHN, as the sole source of  
667 nitrogen.

668

#### 669 **Syringolin A transport assay**

670 An assay for transport of Syringolin A by AtYSL7 and GmYSL7 in the yeast strain  
671  $\Delta$ *pdv5* (Y12409: BY4742; *MATa*; *ura3 $\Delta$ 0*; *leu2 $\Delta$ 0*; *his3 $\Delta$ 1*; *lys2 $\Delta$ 0*;  
672 *YOR153w::kanMX4*, Euroscarf) was done as described in Hofstetter et al. (2013).  
673 Syringolin A was kindly provided by Robert Dudler, University of Zurich.

674

#### 675 **Statistical Analyses**

676 A one-way ANOVA with Tukey's HSD (SAS Enterprise Guide Version 4.3; SAS  
677 Institute Inc., Cary, NC, USA) was used to analyze differences in plant organ dry  
678 mass after growth in varying Fe concentrations. Differences are reported as significant  
679 where  $p < 0.05$ .

680

#### 681 **RNaseq analysis of transcriptome in GmYSL7-RNAi nodules**

682 The transcriptome for *GmYSL7*-RNAi nodules was compared to those transformed  
683 with an empty vector control using RNaseq. Hairy root transformation with  
684 pGmLBC3-pK7GWIWG2 vector or the vector containing *GmYSL7* coding sequence

685 was used to produce transformed nodules. RNA was isolated from nodules 21 or 22  
686 days after inoculation using an RNeasy kit (Qiagen). Five replicates for each  
687 construct were done, each with nodules from 5-7 transformed plants. RNA integrity  
688 number (RIN) was determined on a 2100 bioanalyzer (Agilent) and was between 7  
689 and 8.3 for all samples. RNAseq library construction and analysis were completed at  
690 Institute for Molecular Bioscience Sequencing Facility, The University of  
691 Queensland. A combination of the Ribo Zero rRNA removal bacteria (Illumina) and  
692 Ribo Zero rRNA removal plant (seed and root) (Illumina) was used to eliminate the  
693 rRNA from the sample. The library was constructed using a TruSeq® Stranded  
694 mRNA LT - SetA and SetB (Illumina). Sequencing was performed using the Illumina  
695 NextSeq500 (NextSeq control software v1.4/ Real Time Analysis v2.1). The library  
696 pool was diluted and denatured according to the standard NextSeq protocol, and  
697 sequenced to generate single-end 76 bp reads using a 75 cycle NextSeq500/550 High  
698 Output reagent Kit (Illumina).

699

700 Raw sequence reads were aligned to the JGI Wm82.a2 soybean assembly. DESeq2  
701 (Love et al. 2014) was used to test for differential expression between control and  
702 YSL7-RNAi samples. Genes with  $\log_2$  fold change ( $\log_2$  FC) >1 and adjusted p-value  
703 < 0.05 were considered differentially expressed. Overrepresented biological terms  
704 were identified from the list of differentially expressed genes. GO term enrichment  
705 analysis was based on the information in SoyBase (<https://soybase.org/>). Enriched  
706 biological terms and their linkage were analysed and visualized using ClueGO v2.5.5  
707 (Bindea et al., 2009), implemented in the Cytoscape v3.5.1 environment (Shannon et  
708 al., 2003; <https://cytoscape.org/cy3.html>). ClueGO parameters were as follow:  
709 Analysis Mode, Functional Analysis; Load Markers List, Glycine max (3847); Visual  
710 Style: Significance Shape, ellipse; ClueGO settings, Ontology/Pathway; GO,  
711 Biological Process / KEGG: downloaded the 12/12/2017; Evidence type, All  
712 Evidences; Statistical Test Used = Enrichment/Depletion (Two-sided hypergeometric  
713 test); Correction Method Used = Bonferroni step down; Min GO Level = 3, Max GO  
714 Level = 8, Min Percentage = 4.0, GO Fusion = true, GO Group = true, Kappa Score  
715 Threshold = 0.4; Over View Term = SmallestPValue; Group By Kappa Statistics =  
716 true; Initial Group Size = 1; Sharing Group Percentage = 50.0.

717

718 **Symbiosome isolation, SM and microsomal membrane isolation and proteomic**  
719 **analysis.**

720 Symbiosomes were isolated as described by Clarke et al. (2015). SM was collected  
721 after pelleting of the membrane and resuspended in 1M Urea for proteomic analysis.  
722 Microsomal membrane was isolated from nodules ground and filtered through  
723 miracloth as described in Clarke et al. (2015). Symbiosomes and other intact  
724 organelles were pelleted by centrifugation at 20000 g. The membrane in the  
725 supernatant (enriched in PM and endoplasmic reticulum) was collected by  
726 centrifugation at 100,000 g for 1 hour at 4°C and the pellet resuspended in 8M Urea.  
727 Proteomic analysis was completed at the La Trobe Comprehensive Proteomics  
728 Platform (La Trobe University). Data were collected on a Q Exactive HF (Thermo-  
729 Fisher Scientific) in Data Dependent Acquisition mode using  $m/z$  350–1500 as MS  
730 scan range at 60 000 resolution. HCD MS/MS spectra were collected for the 7 most  
731 intense ions per MS scan at 60 000 resolution with a normalized collision energy of  
732 28% and an isolation window of 1.4  $m/z$ . Dynamic exclusion parameters were set as  
733 follows: exclude isotope on, duration 30 s and peptide match preferred. Other  
734 instrument parameters for the Orbitrap were MS maximum injection time 30 ms with  
735 AGC target  $3 \times 10^6$ , MSMS for a maximum injection time of 110 ms with AGT target  
736 of  $1 \times 10^5$ .

737

738 Raw files consisting of high-resolution MS/MS spectra were processed with  
739 MaxQuant version 1.5.5.1 to detect features and identify proteins using the search  
740 engine Andromeda. Sequence data for soybean from Phytozome  
741 ([https://phytozome.jgi.doe.gov/pz/portal.html#!info?alias=Org\\_Gmax](https://phytozome.jgi.doe.gov/pz/portal.html#!info?alias=Org_Gmax)) was used as  
742 the database for the search engine.

743

744 **ACCESSION NUMBERS**

745 The accession number for *GmYSL7* is NM\_001289202.2

746

747 **ACKNOWLEDGMENTS**

748 We thank Catherine Curie for providing the plasmid containing ZmYS1 and useful  
749 discussions about YSL transporters and Sarah Conte and Elsbeth Walker for  
750 providing advice about the methods for yeast assays for transport of Fe(II)-NA.

751

## 752 SUPPLEMENTAL MATERIAL

753 Supplementary table S1. Unique GmYSL7 and GmNOD26 peptides<sup>1</sup> identified in  
754 purified symbiosome membrane, a microsomal membrane fraction, and a  
755 symbiosome-enriched membrane sample from soybean nodule homogenate.

756 Supplementary table S2. Genes upregulated or downregulated in GmYSL7-RNAi  
757 nodules and data for all genes expressed in the nodules.

758 Supplementary table S3. Primers used in this study.

759 Supplementary figure S1. Phylogenetic analysis of YSL proteins

760 Supplementary figure S2. Expression analysis of the YSL genes in soybean.

761 Supplementary figure S3. Expression of *GmYSL7* in response to Fe status during  
762 nodule development.

763 Supplementary figure S4. Detailed morphological analysis of determinate nodule  
764 development

765 Supplementary figure S5. FM 4-64 stained symbiosomes extracted from empty vector  
766 control and GmYSL7-RNAi nodules.

767

## 768 FIGURE LEGENDS

769 **Figure 1. GmYSL7 is expressed in infected cells of soybean root nodules.** A.  
770 Transcript level of *GmYSL7* in tissue samples from different organs. N, nodules; L,  
771 leaves; DNR, denodulated roots; R, roots. B. Transcript level of *GmYSL7* during  
772 nodule development. 6R, roots 6 days after inoculation (DAI); 10RN, roots and  
773 nodules 10 DAI; 13N-26N, nodules the indicated DAI. Data shown are for three  
774 independent time courses. Bars, SE (n = 3). Nitrogenase activity was first detected at  
775 18 DAI. C. Transgenic root expressing pYSL7:GFP-GUS. GUS staining was not  
776 detectable in the very early stages of nodule development. Arrowhead indicates a  
777 nodule initiation. D. Transgenic pYSL7:GFP-GUS 10-day-old nodule primordia. IR,

778 infected region. E. Transgenic pYSL7:GFP-GUS mature nodule. GUS staining is  
779 restricted to infected cells. OC, outer cortex. F. Magnification of E. Scale bars, 150  
780  $\mu\text{m}$ .

781

782 **Figure 2. Localization of GmYSL7 in soybean nodule cells infected with rhizobia.**

783 A. GFP-GmYSL7 localizes on symbiosome membranes in infected cell of soybean  
784 nodules. B. Colocalization of GFP-YSL7 with membrane lipophilic dye FM4-64 in  
785 the same cell. IC, infected cell; NI, non-infected cell; ROI, region of interest. C.  
786 Fluorescent intensity plot of ROI from B. D. Superimposed confocal image of GFP-  
787 GmYSL7 signal on the symbiosome membrane in rhizobia-infected nodule cells. E.  
788 Free GFP localizes to the cytoplasmic spaces surrounding symbiosomes in infected  
789 cells. F. MtNOD25-GFP (Hohnjec et al. 2009) localizes to the peribacteroid space  
790 inside the symbiosomes. Scale bars, 5 $\mu\text{m}$ .

791

792 **Figure 3. RNAi silencing of GmYSL7 affects nodule development.**

793 A. Transcript level of GmYSL7 and its closest homologs in 24-day-old nodules of empty vector  
794 control and RNAi-GmYSL7 plants (error bars represent SD; n=4; t-test: \*, p<0.05).  
795 B. Nitrogenase enzyme activity in 24-day-old nodules of empty vector control and  
796 RNAi-GmYSL7 plants (error bars represent SD; n=8; t-test: \*\*, p<0.01). C. Fresh  
797 weight of 24-day-old nodules of empty vector control and RNAi-GmYSL7 (error bars  
798 represent SD; t-test: \*, p<0.05). D. Longitudinal section of a 24-day-old nodule from  
799 an empty vector control plant. E. Magnification of (A) showing developed (stage IV)  
800 infected cells. F. Electron microscopy of infected cells of a 24-day-old nodule from  
801 empty vector control containing developed multibacteroid symbiosomes. G.  
802 Longitudinal section of a RNAi-GmYSL7 24-day-old nodule. H. Magnification of (D)  
803 showing undeveloped (stage II) infected cells. I. Electron microscopy of infected cells  
804 of a RNAi-GmYSL7 24-day-old nodule containing undeveloped single-bacteroid  
805 symbiosomes. Scale bars as indicated.

806

807 **Figure 4. RNAseq analysis of GmYSL7-RNAi nodules.**

808 A. Principal component analysis of RNAseq samples. B. Heatmap of clustering of differentially regulated  
809 genes in each nodule sample. Gene-expression values are normalized by using a z-  
810 score transformation on TPM. C, D. Gene Ontology enrichment analysis of biological  
811 processes in up (C) and down (D) regulated genes from GmYSL7 RNAi nodules. GO

812 term enrichment analyses were performed using the ClueGO v2.5.5 plugin (Bindea et  
813 al., 2009) in Cytoscape v3.5.1 (Shannon et al., 2003). Circles represent an enriched  
814 group of genes based on their GO terms. Circle size and colour indicate the number of  
815 mapped genes and associated Term PValue corrected with Bonferroni step down.

816

817 **Figure 5. GmYSL7 does not transport iron or Fe(II)-nicotianamine (NA).**

818 DEY1530 yeast (*fet3/fet4/ftr1*) was transformed with the empty vector plasmid  
819 pDR196, *AtYSL7*, *GmYSL7* or *ZmYSI* in pDR196GW. Serial dilutions of each yeast  
820 transformant were applied to SD plates (that include 1.6  $\mu$ M FeCl<sub>3</sub>) with 10  $\mu$ M Fe-  
821 citrate, Fe(II)-NA or no added iron (no iron) and the plates grown for 3-5 days.

822

823 **Figure 6. GmYSL7 and AtYSL7 transport oligopeptides.** *AtOPT4*, *AtYSL7*,

824 *GmYSL7* in pDR196GW and the empty vector (pDR196) were introduced into the  
825 yeast *opt1* mutant, Y11213. Serial dilutions of each transformant were grown as  
826 above on minimal medium containing either 10 mM NH<sub>4</sub>Cl (positive control) or 100  
827  $\mu$ M peptide (with sequence as indicated) as the sole source of nitrogen

828

829 **Figure 7. GmYSL7 transports Syringolin A.** BY4742 yeast  $\Delta$ *ptr5:KanMX6*

830 transformed with the empty vector (pDR196) or the vector expressing *AtYSL7* or  
831 *GmYSL7* were plated as a lawn on solid synthetic defined (SD) media. Filter disks  
832 with the indicated Syla solutions were placed onto the plates and inhibition of growth  
833 examined after 2 days.

834

835 **Figure 8. GmYSL7 is functionally equivalent to MtYSL7.** A. Growth of

836 representative wild type (WT), *ysl7-1*, and *ysl7-1* transformed with *GmYSL7*  
837 controlled by the *MtYSL7* promoter (*ysl7-1 MtYSL7<sub>prom</sub>:: GmYSL7*). Bar = 1 cm. B.

838 Dry weight of 28 dpi WT, *ysl7-1*, and *ysl7-1 MtYSL7<sub>prom</sub>:: GmYSL7* plants. Data are  
839 the mean  $\pm$  SE of 5 transformed plants. C. Nitrogenase activity of 28 dpi WT, *ysl7-1*,

840 and *ysl7-1 MtYSL7<sub>prom</sub>:: GmYSL7* plants. Acetylene reduction was measured in  
841 duplicate from two sets of three-four pooled plants. Data are the mean  $\pm$  SE. \*

842 indicates statistically significant differences ( $p < 0.05$ )

843

844

845



## Parsed Citations

**Abbamondi GR, De Rosa S, Iodice C, Tommonaro G (2014) Cyclic Dipeptides Produced by Marine Sponge-Associated Bacteria as Quorum Sensing Signals. Nat. Prod. Commun 9: 229-232**

Pubmed: [Author and Title](#)

Google Scholar: [Author Only Title Only Author and Title](#)

**Acuña G, Alvarez-Morales A, Hahn M, Hennecke H (1987) A vector for the site-directed, genomic integration of foreign DNA into soybean root-nodule bacteria. Plant Mol. Biol. 9: 41-50**

Pubmed: [Author and Title](#)

Google Scholar: [Author Only Title Only Author and Title](#)

**Avenhaus U, Cabeza RA, Liese R, Lingner A, Dittert K, Salinas-Riester G, Pommerenke C and Schulze J (2016) Short-Term Molecular Acclimation Processes of Legume Nodules to Increased External Oxygen Concentration. Front. Plant Sci. 6: 1133. doi: 10.3389/fpls.2015.01133**

Pubmed: [Author and Title](#)

Google Scholar: [Author Only Title Only Author and Title](#)

**Becana M, Wienkoop S, Matamoros MA (2018) Sulfur Transport and Metabolism in Legume Root Nodules. Front. Plant Sci. 9 :1434. doi:10.3389/fpls.2018.01434**

Pubmed: [Author and Title](#)

Google Scholar: [Author Only Title Only Author and Title](#)

**Bindea G, Mlecnik B, Hackl H, Charoentong P, Tosolini M, Kirilovsky A, Fridman WH, Pagès F, Trajanoski Z, Galon J (2009) ClueGO: a Cytoscape plug-in to decipher functionally grouped gene ontology and pathway annotation networks. Bioinformatics. 25: 1091-1093. doi: 10.1093/bioinformatics/btp101.**

Pubmed: [Author and Title](#)

Google Scholar: [Author Only Title Only Author and Title](#)

**Boisson-Dernier A, Chabaud M, Garcia F, Becard G, Rosenberg C, Barker DG (2001) Agrobacterium rhizogenes-transformed roots of Medicago truncatula for the study of nitrogen-fixing and endomycorrhizal symbiotic associations. Mol. Plant-Microbe Interact. 14: 695-700**

Pubmed: [Author and Title](#)

Google Scholar: [Author Only Title Only Author and Title](#)

**Brear EM, Day DA, Smith PMC (2013) Iron: an essential micronutrient for the legume–rhizobium symbiosis. Front. Plant Sci. 4: 359**

Pubmed: [Author and Title](#)

Google Scholar: [Author Only Title Only Author and Title](#)

**Broughton WJ, Dilworth MJ (1971) Control of leghemoglobin synthesis in snake beans. Biochem. J. 125: 1075-1080**

Pubmed: [Author and Title](#)

Google Scholar: [Author Only Title Only Author and Title](#)

**Cabeza R, Koester B, Liese R, Lingner A, Baumgarten V, Dirks J, Salinas-Riester G, Pommerenke C, Dittert K, Schulze J (2014) An RNA sequencing transcriptome analysis reveals novel insights into molecular aspects of the nitrate impact on the nodule activity of Medicago truncatula. Plant Physiol. 164: 400-11. doi: 10.1104/pp.113.228312.**

Pubmed: [Author and Title](#)

Google Scholar: [Author Only Title Only Author and Title](#)

**Catalano CM, Lane WS, Sherrier DJ (2004) Biochemical characterization of symbiosome membrane proteins from Medicago truncatula root nodules. Electrophoresis 25: 519-531**

Pubmed: [Author and Title](#)

Google Scholar: [Author Only Title Only Author and Title](#)

**Chu HH, Chiecko J, Punshon T, Lanzirotti A, Lahner B, Salt DE, Walker EL (2010) Successful Reproduction Requires the Function of Arabidopsis YELLOW STRIPE-LIKE1 and YELLOW STRIPE-LIKE3 Metal-Nicotianamine Transporters in Both Vegetative and Reproductive Structures. Plant Physiol. 154: 197-210**

Pubmed: [Author and Title](#)

Google Scholar: [Author Only Title Only Author and Title](#)

**Clarke VC, Loughlin PC, Day DA, Smith PMC (2014) Transport processes of the legume symbiosome membrane. Front. in Plant Sci. 5: 699. doi:10.3389/fpls.2014.00699**

Pubmed: [Author and Title](#)

Google Scholar: [Author Only Title Only Author and Title](#)

**Clarke VC, Loughlin PC, Gavrin A, Chen C, Brear EM, Day DA, Smith PMC (2015) Proteomic analysis of the soybean symbiosome identifies new symbiotic proteins. Mol. Cell Proteomics 14: 1301-1322**

Pubmed: [Author and Title](#)

Google Scholar: [Author Only Title Only Author and Title](#)

**Conte SS, Chu HH, Chan-Rodriguez D, Punshon T, Vasques KA, Salt DE, Walker EL (2013) Arabidopsis thaliana Yellow Stripe1-Like4 and Yellow Stripe1-Like6 localize to internal cellular membranes and are involved in metal ion homeostasis. Front. Plant Sci. 4: 283. doi:10.3389/fpls.2013.00283**

Pubmed: [Author and Title](#)

Google Scholar: [Author Only Title Only Author and Title](#)

**Curie C, Panaviene Z, Loulergue C, Dellaporta SL, Briat JF, Walker EL (2001) Maize yellow stripe1 encodes a membrane protein directly involved in Fe(III) uptake. Nature. 409: 346-349. doi: 10.1038/35053080.**

Pubmed: [Author and Title](#)

Google Scholar: [Author Only Title Only Author and Title](#)

**Curie C, Cassin G, Couch D, Divol F, Higuchi K, Jean M, Misson J, Schikora A, Czernic P, Mari S (2009) Metal movement within the plant: contribution of nicotianamine and yellow stripe 1-like transporters. Ann. Bot. 103: 1-11**

Pubmed: [Author and Title](#)

Google Scholar: [Author Only Title Only Author and Title](#)

**Dai J, Wang NQ, Xiong HC, Qiu W, Nakanishi H, Kobayashi T, Nishizawa NK, Zuo YM (2018) The Yellow Stripe-Like (YSL) Gene Functions in Internal Copper Transport in Peanut. Genes 9: 635. doi:10.3390/genes9120635**

Pubmed: [Author and Title](#)

Google Scholar: [Author Only Title Only Author and Title](#)

**Divol F, Couch D, Con  j  ro G, Roschztardt H, Mari S, Curie C (2013) The Arabidopsis YELLOW STRIPE LIKE4 and 6 Transporters Control Iron Release from the Chloroplast. Plant Cell 25: 1040-1055**

Pubmed: [Author and Title](#)

Google Scholar: [Author Only Title Only Author and Title](#)

**Dohmen RJ, Strasser AWM, Honer CB, Hollenberg CP (1991) An efficient transformation procedure enabling long-term storage of competent cells of various yeast genera. Yeast 7: 691-692**

Pubmed: [Author and Title](#)

Google Scholar: [Author Only Title Only Author and Title](#)

**Fowler D, Coyle M, Skiba U, Sutton MA, Cape JN, Reis S, Sheppard LJ, Jenkins A, Grizzetti B, Galloway JN, Vitousek P, Leach A, Bouwman AF, Butterbach-Bahl K, Dentener F, Stevenson D, Amann M, Voss M (2013) The global nitrogen cycle in the twenty-first century. Philos. Trans. R. Soc. B-Biol. Sci. 368**

Pubmed: [Author and Title](#)

Google Scholar: [Author Only Title Only Author and Title](#)

**Gavrin A, Chiasson D, Ovchinnikova E, Kaiser BN, Bisseling T, Fedorova EE (2016) VAMP721a and VAMP721d are important for pectin dynamics and release of bacteria in soybean nodules. New Phytol. 210:1011-21**

Pubmed: [Author and Title](#)

Google Scholar: [Author Only Title Only Author and Title](#)

**Gavrin A, Kaiser BN, Geiger D, Tyerman SD, Wen Z, Bisseling T, Fedorova EE (2014) Adjustment of Host Cells for Accommodation of Symbiotic Bacteria: Vacuole Defunctionalization, HOPS Suppression, and TIP1g Retargeting in Medicago. Plant Cell 26: 3809-3822**

Pubmed: [Author and Title](#)

Google Scholar: [Author Only Title Only Author and Title](#)

**Gonz  lez-Guerrero M, V. E, S  ez   , Tejada-Jim  nez M (2016) Transition metal transport in plants and associated endosymbionts. Arbuscular mycorrhizal fungi and rhizobia. Front. Plant Sci. 7: 1088**

Pubmed: [Author and Title](#)

Google Scholar: [Author Only Title Only Author and Title](#)

**Hastwell AH, Gresshoff PM, Ferguson BJ. (2015) Genome-wide annotation and characterization of CLAVATA/ESR (CLE) peptide hormones of soybean (*Glycine max*) and common bean (*Phaseolus vulgaris*), and their orthologues of *Arabidopsis thaliana*. J Exp Bot. 66: 5271-87. doi: 10.1093/jxb/erv351.**

Pubmed: [Author and Title](#)

Google Scholar: [Author Only Title Only Author and Title](#)

**Hofstetter SS, Dudnik A, Widmer H, Dudler R (2013) Arabidopsis YELLOW STRIPE-LIKE7 (YSL7) and YSL8 Transporters Mediate Uptake of Pseudomonas Virulence Factor Syringolin A into Plant Cells. Mol. Plant-Microbe Interact. 26: 1302-1311**

Pubmed: [Author and Title](#)

Google Scholar: [Author Only Title Only Author and Title](#)

**Hohnjec N, Lenz F, Fehlberg V, Vieweg MF, Baier MC, Hause B, K  ster H (2008) The Signal Peptide of the *Medicago truncatula* Modular Nodulin MtNOD25 Operates as an Address Label for the Specific Targeting of Proteins to Nitrogen-Fixing Symbiosomes. Mol. Plant-Microbe Interact. 22: 63-72**

Pubmed: [Author and Title](#)

Google Scholar: [Author Only Title Only Author and Title](#)

**Karimi M, Inze D, Depicker A (2002) GATEWAY(TM) vectors for Agrobacterium-mediated plant transformation. Trends Plant Sci. 7: 193-195**

Pubmed: [Author and Title](#)

Google Scholar: [Author Only Title Only Author and Title](#)

**Kiers ET, Rousseau RA, West SA, Denison RF (2003) Host sanctions and the legume-rhizobium mutualism. Nature 425: 78-81**

Pubmed: [Author and Title](#)

Google Scholar: [Author Only Title Only Author and Title](#)

**Krusell L, Krause K, Ott T, Desbrosses G, Kramer U, Sato S, Nakamura Y, Tabata S, James EK, Sandal N, Stougaard J, Kawaguchi M, Miyamoto A, Suganuma N, Udvardi MK (2005) The sulfate transporter SST1 is crucial for symbiotic nitrogen fixation in *Lotus japonicus* root nodules. *Plant Cell* 17: 1625-1636**

Pubmed: [Author and Title](#)

Google Scholar: [Author Only Title Only Author and Title](#)

**Libault M, Thibivilliers S, Bilgin DD, Radwan O, Benitez M, Clough SJ, Stacey G (2008) Identification of Four Soybean Reference Genes for Gene Expression Normalization. *Plant Genome* 1: 44-54**

Pubmed: [Author and Title](#)

Google Scholar: [Author Only Title Only Author and Title](#)

**Limpens E, Ivanov S, van Esse W, Voets G, Fedorova E, Bisseling T (2009) Medicago N<sub>2</sub>-Fixing Symbiosomes Acquire the Endocytic Identity Marker Rab7 but Delay the Acquisition of Vacuolar Identity. *Plant Cell* 21: 2811-2828**

Pubmed: [Author and Title](#)

Google Scholar: [Author Only Title Only Author and Title](#)

**Liu T, Zeng JQ, Xia KF, Fan T, Li YG, Wang YQ, Xu XL, Zhang MY (2012) Evolutionary expansion and functional diversification of oligopeptide transporter gene family in rice. *Rice* 5: 12. doi:10.1186/1939-8433-5-12**

Pubmed: [Author and Title](#)

Google Scholar: [Author Only Title Only Author and Title](#)

**Love MI, Huber W, Anders S (2014) Moderated estimation of fold change and dispersion for RNA-seq data with DESeq2. *Genome Biol* 15:550.**

Pubmed: [Author and Title](#)

Google Scholar: [Author Only Title Only Author and Title](#)

**Lubkowitz M (2011) The Oligopeptide Transporters: A Small Gene Family with a Diverse Group of Substrates and Functions? *Mol Plant* 4: 407-415**

Pubmed: [Author and Title](#)

Google Scholar: [Author Only Title Only Author and Title](#)

**Mohammadi-Dehcheshmeh M, Ebrahimie E, Tyerman SD, Kaiser BN (2014) A novel method based on combination of semi-in vitro and in vivo conditions in *Agrobacterium rhizogenes*-mediated hairy root transformation of Glycine species. *In Vitro Cell. Dev.* 50: 282-291.**

Pubmed: [Author and Title](#)

Google Scholar: [Author Only Title Only Author and Title](#)

**Mohd-Noor SN, Day DA and Smith PMC (2015) Chapter 68: The Symbiosome Membrane. In: *Biological Nitrogen Fixation. Volume 2*. Ed. Frans de Bruijn. P683-694 Wiley-Blackwell. ISBN: 978-1-118-63704-3.**

Pubmed: [Author and Title](#)

Google Scholar: [Author Only Title Only Author and Title](#)

**Pessi G, Ahrens CH, Rehrauer H, Lindemann A, Hauser F, Fischer HM, Hennecke H (2007) Genome-wide transcript analysis of *Bradyrhizobium japonicum* bacteroids in soybean root nodules. *Mol. Plant-Microbe Interact.* 20: 1353-1363**

Pubmed: [Author and Title](#)

Google Scholar: [Author Only Title Only Author and Title](#)

**Ramakers C, Ruijter JM, Deprez RHL, Moorman AFM (2003) Assumption-free analysis of quantitative real-time polymerase chain reaction (PCR) data. *Neurosci. Lett.* 339: 62-66**

Pubmed: [Author and Title](#)

Google Scholar: [Author Only Title Only Author and Title](#)

**Reid DE, Ferguson BJ, Gresshoff PM (2011) Inoculation- and nitrate-induced CLE peptides of soybean control NARK-dependent nodule formation. *Mol Plant Microbe Interact.* 24:606-18. doi: 10.1094/MPMI-09-10-0207.**

Pubmed: [Author and Title](#)

Google Scholar: [Author Only Title Only Author and Title](#)

**Saier MH (2000) Families of transmembrane transporters selective for amino acids and their derivatives. *Microbiology* 146: 1775-1795**

Pubmed: [Author and Title](#)

Google Scholar: [Author Only Title Only Author and Title](#)

**Sasaki A, Yamaji N, Xia JX, Ma JF (2011) OsYSL6 Is Involved in the Detoxification of Excess Manganese in Rice. *Plant Physiol.* 157: 1832-1840**

Pubmed: [Author and Title](#)

Google Scholar: [Author Only Title Only Author and Title](#)

**Schaaf G, Ludewig U, Erenoglu BE, Mori S, Kitahara T, von Wiren N (2004) ZmYS1 functions as a proton-coupled symporter for phytosiderophore- and nicotianamine-chelated metals. *J. Biol. Chem.* 279: 9091-9096**

Pubmed: [Author and Title](#)

Google Scholar: [Author Only Title Only Author and Title](#)

**Schmutz J, Cannon SB, Schlueter J, Ma J, Mitros T, Nelson W, Hyten DL, Song Q, Thelen JJ, Cheng J, Xu D, Hellsten U, May GD, Yu Y, Sakurai T, Umezawa T, Bhattacharyya MK, Sandhu D, Valliyodan B, Lindquist E, Peto M, Grant D, Shu S, Goodstein D, Barry K, Futrell-Griggs M, Abernathy B, Du J, Tian Z, Zhu L, Gill N, Joshi T, Libault M, Sethuraman A, Zhang X-C, Shinozaki K, Nguyen HT, Wing RA, Cregan P, Specht J, Grimwood J, Rokhsar D, Stacey G, Shoemaker RC, Jackson SA (2010) Genome sequence of the palaeopolyploid**

**soybean. Nature 463: 178-183**

Pubmed: [Author and Title](#)

Google Scholar: [Author Only Title Only Author and Title](#)

**Schneider S, Schintlmeister A, Becana M, Wagner M, Wobken D, Wienkoop S (2019) Sulfate is transported at significant rates through the symbiosome membrane and is crucial for nitrogenase biosynthesis. Plant Cell Environ. 42: 1180–1189. doi:10.1111/pce.13481**

Pubmed: [Author and Title](#)

Google Scholar: [Author Only Title Only Author and Title](#)

**Severin AJ, Woody JL, Bolon YT, Joseph B, Diers BW, Farmer AD, Muehlbauer GJ, Nelson RT, Grant D, Specht JE, Graham MA, Cannon SB, May GD, Vance CP, Shoemaker RC (2010) RNA-Seq Atlas of Glycine max: A guide to the soybean transcriptome. BMC Plant Biol. 10 10: 160. doi:10.1186/1471-2229-10-160**

Pubmed: [Author and Title](#)

Google Scholar: [Author Only Title Only Author and Title](#)

**Shannon P, Markiel A, Ozier O, Baliga NS, Wang JT, Ramage D, Amin N, Schwikowski B, Ideker T (2003) Cytoscape: A Software Environment for Integrated Models of Biomolecular Interaction Networks. Genome Res 13: 2498–2504**

Pubmed: [Author and Title](#)

Google Scholar: [Author Only Title Only Author and Title](#)

**Smith PM, Atkins CA (2002) Purine biosynthesis. Big in cell division, even bigger in nitrogen assimilation. Plant Physiol.;128: 793–802. doi:10.1104/pp.010912**

Pubmed: [Author and Title](#)

Google Scholar: [Author Only Title Only Author and Title](#)

**Spizzo T, Byersdorfer C, Dueterhoeft S, Eide D. (1997) The yeast FET5 gene encodes a FET3-related multicopper oxidase implicated in iron transport. Mol Gen Genet. 256: 547–556. doi:10.1007/pl00008615**

Pubmed: [Author and Title](#)

Google Scholar: [Author Only Title Only Author and Title](#)

**Stacey MG, Patel A, McClain WE, Mathieu M, Remley M, Rogers EE, Gassmann W, Blevins DG, Stacey G (2008) The Arabidopsis AtOPT3 protein functions in metal homeostasis and movement of iron to developing seeds. Plant Physiol. 146: 589-601**

Pubmed: [Author and Title](#)

Google Scholar: [Author Only Title Only Author and Title](#)

**Thompson JD, Higgins DG, Gibson TJ (1994) CLUSTAL W: improving the sensitivity of progressive multiple sequence alignment through sequence weighting, position-specific gap penalties and weight matrix choice. Nucleic Acids Res. 22: 4673–4680. doi:10.1093/nar/22.22.4673**

Pubmed: [Author and Title](#)

Google Scholar: [Author Only Title Only Author and Title](#)

**Trevaskis B, Wandrey M, Colebatch G, Udvardi MK (2002) The soybean GmN6L gene encodes a late nodulin expressed in the infected zone of nitrogen-fixing nodules. Mol. Plant-Microbe Interact. 15: 630-636**

Pubmed: [Author and Title](#)

Google Scholar: [Author Only Title Only Author and Title](#)

**Udvardi M, Poole PS (2013) Transport and Metabolism in Legume-Rhizobia Symbioses. Annu. Rev. Plant Biol. 64: 781-805**

Pubmed: [Author and Title](#)

Google Scholar: [Author Only Title Only Author and Title](#)

**Udvardi MK, Day DA (1997) Metabolite transport across symbiotic membranes of legume nodules. Annu. Rev. Plant Physiol. Plant Mol. Biol. 48: 493-523**

Pubmed: [Author and Title](#)

Google Scholar: [Author Only Title Only Author and Title](#)

**Unkovich M, Baldock J (2008) Measurement of a symbiotic N<sub>2</sub> fixation in Australian agriculture. Soil Biol. Biochem. 40: 2915-2921**

Pubmed: [Author and Title](#)

Google Scholar: [Author Only Title Only Author and Title](#)

**Vance CP (2001) Symbiotic nitrogen fixation and phosphorus acquisition. Plant nutrition in a world of declining renewable resources. Plant Physiol., 127: 390–397.**

Pubmed: [Author and Title](#)

Google Scholar: [Author Only Title Only Author and Title](#)

**Van de Velde W, Zehirov G, Szatmari A, Debreczeny M, Ishihara H, Kevei Z, Farkas A, Mikulass K, Nagy A, Tiricz H, Satiat-Jeunemaitre B, Alunni B, Bourge M, Kucho K-i, Abe M, Kereszt A, Maroti G, Uchiumi T, Kondorosi E, Mergaert P (2010) Plant Peptides Govern Terminal Differentiation of Bacteria in Symbiosis. Science 327: 1122-1126**

Pubmed: [Author and Title](#)

Google Scholar: [Author Only Title Only Author and Title](#)

**Vandesompele J, De Preter K, Pattyn F, Poppe B, Van Roy N, De Paepe A, Speleman F (2002) Accurate normalization of real-time quantitative RT-PCR data by geometric averaging of multiple internal control genes. Genome Biol. 3**

Pubmed: [Author and Title](#)

Google Scholar: [Author Only Title Only Author and Title](#)

**Vida TA, Emr SD (1995) A new vital stain for visualizing vacuolar membrane dynamics and endocytosis in yeast. J. Cell Biol. 128: 779-792**

Pubmed: [Author and Title](#)

Google Scholar: [Author Only](#) [Title Only](#) [Author and Title](#)

**Wienkoop S, Saalbach G (2003) Proteome analysis. Novel proteins identified at the peribacteroid membrane from Lotus japonicus root nodules. Plant Physiol. 131: 1080-1090**

Pubmed: [Author and Title](#)

Google Scholar: [Author Only](#) [Title Only](#) [Author and Title](#)

**Xu C, Nadon BD, Kim KD, Jackson SA (2018) Genetic and epigenetic divergence of duplicate genes in two legume species. Plant, Cell Environ. 41: 2033-2044**

Pubmed: [Author and Title](#)

Google Scholar: [Author Only](#) [Title Only](#) [Author and Title](#)

**Yen MR, Tseng YH, Saier MH (2001) Maize Yellow Stripe1, an iron-phytosiderophore uptake transporter, is a member of the oligopeptide transporter (OPT) family. Microbiology 147: 2881-2883**

Pubmed: [Author and Title](#)

Google Scholar: [Author Only](#) [Title Only](#) [Author and Title](#)
